# Supplementary material for: Sleep and cognitive performance of African-Americans and European-Americans before and during circadian misalignment produced by an abrupt 9-h delay in the sleep/wake schedule
Source: PubMed Central journal article supplement (PMC5658102; doi:10.1371/journal.pone.0186843), 2017-10-26
Supplement: pone.0186843.s001.pdf [file pone.0186843.s001.pdf]

# FAMILY / ANCESTOR FORM

Biological Rhythms Research Lab  
Rush University Medical Center

Name \_\_\_\_\_ Date \_\_\_\_\_  
Month / Day / Year

We are interested in learning about the body clock (circadian clock) of people from all the different ethnic and racial backgrounds. In order to make sure we have people from a variety of different ethnic and racial groups, we need to ask you some questions about your background. We will also be asking questions about the race/ethnicity of your parents and grandparents. Feel free to call your relatives for help. If necessary, you will be able to take this form home to get more information.

1. Where were you born?

A. City \_\_\_\_\_ Don't know \_\_\_\_\_

B. State \_\_\_\_\_ Don't know \_\_\_\_\_

C. Country \_\_\_\_\_ Don't know \_\_\_\_\_

2. Please put check marks by your race/ethnicity (check **ALL** that apply).

Please circle the word or words in the descriptions below if they led you to choose any of the categories.

A. WHITE \_\_\_\_\_

A person whose family and ancestors came from Europe, the Middle East or North Africa.

B. BLACK OR AFRICAN AMERICAN \_\_\_\_\_

A person whose family and ancestors belonged to any of the black racial groups of Africa.

C. ASIAN \_\_\_\_\_

A person whose family and ancestors came from the Far East, Southeast Asia, or the Indian subcontinent, including, for example, Cambodia, China, India, Japan, Korea, Malaysia, Pakistan, the Philippine Islands, Thailand, and Vietnam.

D. HISPANIC OR LATINO \_\_\_\_\_

A person of Cuban, Mexican, Puerto Rican, South or Central American, or other Spanish culture or origin, regardless of "race."

E. EUROPEAN \_\_\_\_\_

A person whose family and ancestors came from Britain, Ireland, France, Spain, Sweden, Germany, Poland, Russia, Yugoslavia, Romania, Lithuania, etc.

F. MIDDLE EASTERN \_\_\_\_\_

A person whose family and ancestors came from Saudi Arabia, Iraq, Iran, Turkey, Syria, Jordan, Lebanon, Israel, etc. Also those who consider themselves Arabian, Persian, etc.

**(SEE MORE CATEGORIES ON THE NEXT PAGE)**

G. FAR EAST ASIAN \_\_\_\_\_

A person whose family and ancestors came from China, Japan, Korea, Hong Kong, Taiwan, etc.

H. SOUTHEAST ASIAN \_\_\_\_\_

A person whose family and ancestors came from Indonesia, Thailand, Cambodia, Malaysia, the Philippines, Singapore, Laos, Vietnam, Burma (Myanmar), etc.

I. INDIAN SUBCONTINENT \_\_\_\_\_

A person whose family and ancestors came from India, Afghanistan, Pakistan, Bangladesh, Nepal, Sri Lanka, etc.

J. NORTH AFRICAN \_\_\_\_\_

A person whose family and ancestors came from Algeria, Morocco, Egypt, Libya, Tunisia, etc.

K. AFRO-CARIBBEAN \_\_\_\_\_

A person whose family and ancestors came from Jamaica, Haiti, the Dominican Republic, etc. Also, those who consider themselves Creole.

L. AMERICAN INDIAN OR ALASKA NATIVE \_\_\_\_\_

A person whose family and ancestors came from North, Central, or South America.

M. NATIVE HAWAIIAN OR OTHER PACIFIC ISLANDER \_\_\_\_\_

A person whose family and ancestors came from Hawaii, Guam, Samoa, or other Pacific Islands.

N. OTHER \_\_\_\_\_

If possible please elaborate. If you think there are additional or better terms to describe your race/ethnicity please add them here.

---

---

---

---

---

---

O. DON'T KNOW \_\_\_\_\_

On the next pages please fill in as much as you can about your blood relatives.

**IF YOU ARE ADOPTED** and do not know anything about your biological parents check here and skip the rest of this form. \_\_\_\_\_

**YOUR BIOLOGICAL MOTHER**

1. Please fill in her place of birth.

A. City \_\_\_\_\_ Don't know \_\_\_\_\_

B. State \_\_\_\_\_ Don't know \_\_\_\_\_

C. Country \_\_\_\_\_ Don't know \_\_\_\_\_

2. Please put check marks for her race/ethnicity (check **ALL** that apply).

Look back at the first 2 pages for definitions. Please choose all of the words from those definitions that apply to her and write them below.

A. WHITE \_\_\_\_\_

B. BLACK OR AFRICAN AMERICAN \_\_\_\_\_

C. ASIAN \_\_\_\_\_

D. HISPANIC OR LATINO \_\_\_\_\_

E. EUROPEAN \_\_\_\_\_

F. MIDDLE EASTERN \_\_\_\_\_

G. FAR EAST ASIAN \_\_\_\_\_

H. SOUTHEAST ASIAN \_\_\_\_\_

I. INDIAN SUBCONTINENT \_\_\_\_\_

J. NORTH AFRICAN \_\_\_\_\_

K. AFRO-CARIBBEAN \_\_\_\_\_

L. AMERICAN INDIAN OR ALASKA NATIVE \_\_\_\_\_

M. NATIVE HAWAIIAN OR OTHER PACIFIC ISLANDER \_\_\_\_\_

N. OTHER \_\_\_\_\_

If possible please elaborate. If you think there are additional or better terms to describe her race/ethnicity please add them here.

\_\_\_\_\_  
\_\_\_\_\_  
\_\_\_\_\_

O. DON'T KNOW \_\_\_\_\_

**YOUR BIOLOGICAL FATHER**

1. Please fill in his place of birth.

A. City \_\_\_\_\_ Don't know \_\_\_\_\_

B. State \_\_\_\_\_ Don't know \_\_\_\_\_

C. Country \_\_\_\_\_ Don't know \_\_\_\_\_

2. Please put check marks for his race/ethnicity (check **ALL** that apply).

Look back at the first 2 pages for definitions. Please choose all of the words from those definitions that apply to him and write them below.

A. WHITE \_\_\_\_\_

B. BLACK OR AFRICAN AMERICAN \_\_\_\_\_

C. ASIAN \_\_\_\_\_

D. HISPANIC OR LATINO \_\_\_\_\_

E. EUROPEAN \_\_\_\_\_

F. MIDDLE EASTERN \_\_\_\_\_

G. FAR EAST ASIAN \_\_\_\_\_

H. SOUTHEAST ASIAN \_\_\_\_\_

I. INDIAN SUBCONTINENT \_\_\_\_\_

J. NORTH AFRICAN \_\_\_\_\_

K. AFRO-CARIBBEAN \_\_\_\_\_

L. AMERICAN INDIAN OR ALASKA NATIVE \_\_\_\_\_

M. NATIVE HAWAIIAN OR OTHER PACIFIC ISLANDER \_\_\_\_\_

N. OTHER \_\_\_\_\_

If possible please elaborate. If you think there are additional or better terms to describe his race/ethnicity please add them here.

\_\_\_\_\_  
\_\_\_\_\_  
\_\_\_\_\_

O. DON'T KNOW \_\_\_\_\_

**YOUR GRANDMOTHER ON YOUR MOTHER'S SIDE**  
**(YOUR MOTHER'S BIOLOGICAL MOTHER)**

1. Please fill in her place of birth.

A. City \_\_\_\_\_ Don't know \_\_\_\_\_

B. State \_\_\_\_\_ Don't know \_\_\_\_\_

C. Country \_\_\_\_\_ Don't know \_\_\_\_\_

2. Please put check marks for her race/ethnicity (check **ALL** that apply).

Look back at the first 2 pages for definitions. Please choose all of the words from those definitions that apply to her and write them below.

A. WHITE \_\_\_\_\_

B. BLACK OR AFRICAN AMERICAN \_\_\_\_\_

C. ASIAN \_\_\_\_\_

D. HISPANIC OR LATINO \_\_\_\_\_

E. EUROPEAN \_\_\_\_\_

F. MIDDLE EASTERN \_\_\_\_\_

G. FAR EAST ASIAN \_\_\_\_\_

H. SOUTHEAST ASIAN \_\_\_\_\_

I. INDIAN SUBCONTINENT \_\_\_\_\_

J. NORTH AFRICAN \_\_\_\_\_

K. AFRO-CARIBBEAN \_\_\_\_\_

L. AMERICAN INDIAN OR ALASKA NATIVE \_\_\_\_\_

M. NATIVE HAWAIIAN OR OTHER PACIFIC ISLANDER \_\_\_\_\_

N. OTHER \_\_\_\_\_

If possible please elaborate. If you think there are additional or better terms to describe her race/ethnicity please add them here.

\_\_\_\_\_

\_\_\_\_\_

\_\_\_\_\_

O. DON'T KNOW \_\_\_\_\_

**YOUR GRANDFATHER ON YOUR MOTHER'S SIDE**  
**(YOUR MOTHERS BIOLOGICAL FATHER)**

1. Please fill in his place of birth.

A. City \_\_\_\_\_ Don't know \_\_\_\_\_

B. State \_\_\_\_\_ Don't know \_\_\_\_\_

C. Country \_\_\_\_\_ Don't know \_\_\_\_\_

2. Please put check marks for his race/ethnicity (check **ALL** that apply).

Look back at the first 2 pages for definitions. Please choose all of the words from those definitions that apply to him and write them below.

A. WHITE \_\_\_\_\_

B. BLACK OR AFRICAN AMERICAN \_\_\_\_\_

C. ASIAN \_\_\_\_\_

D. HISPANIC OR LATINO \_\_\_\_\_

E. EUROPEAN \_\_\_\_\_

F. MIDDLE EASTERN \_\_\_\_\_

G. FAR EAST ASIAN \_\_\_\_\_

H. SOUTHEAST ASIAN \_\_\_\_\_

I. INDIAN SUBCONTINENT \_\_\_\_\_

J. NORTH AFRICAN \_\_\_\_\_

K. AFRO-CARIBBEAN \_\_\_\_\_

L. AMERICAN INDIAN OR ALASKA NATIVE \_\_\_\_\_

M. NATIVE HAWAIIAN OR OTHER PACIFIC ISLANDER \_\_\_\_\_

N. OTHER \_\_\_\_\_

If possible please elaborate. If you think there are additional or better terms to describe his race/ethnicity please add them here.

\_\_\_\_\_

\_\_\_\_\_

\_\_\_\_\_

O. DON'T KNOW \_\_\_\_\_

**YOUR GRANDMOTHER ON YOUR FATHER'S SIDE**  
**(YOUR FATHER'S BIOLOGICAL MOTHER)**

1. Please fill in her place of birth.

A. City \_\_\_\_\_ Don't know \_\_\_\_\_

B. State \_\_\_\_\_ Don't know \_\_\_\_\_

C. Country \_\_\_\_\_ Don't know \_\_\_\_\_

2. Please put check marks for her race/ethnicity (check **ALL** that apply).

Look back at the first 2 pages for definitions. Please choose all of the words from those definitions that apply to her and write them below.

A. WHITE \_\_\_\_\_

B. BLACK OR AFRICAN AMERICAN \_\_\_\_\_

C. ASIAN \_\_\_\_\_

D. HISPANIC OR LATINO \_\_\_\_\_

E. EUROPEAN \_\_\_\_\_

F. MIDDLE EASTERN \_\_\_\_\_

G. FAR EAST ASIAN \_\_\_\_\_

H. SOUTHEAST ASIAN \_\_\_\_\_

I. INDIAN SUBCONTINENT \_\_\_\_\_

J. NORTH AFRICAN \_\_\_\_\_

K. AFRO-CARIBBEAN \_\_\_\_\_

L. AMERICAN INDIAN OR ALASKA NATIVE \_\_\_\_\_

M. NATIVE HAWAIIAN OR OTHER PACIFIC ISLANDER \_\_\_\_\_

N. OTHER \_\_\_\_\_

If possible please elaborate. If you think there are additional or better terms to describe her race/ethnicity please add them here.

\_\_\_\_\_

\_\_\_\_\_

\_\_\_\_\_

O. DON'T KNOW \_\_\_\_\_

**YOUR GRANDFATHER ON YOUR FATHER'S SIDE**  
**(YOUR FATHER'S BIOLOGICAL FATHER)**

1. Please fill in his place of birth.

A. City \_\_\_\_\_ Don't know \_\_\_\_\_

B. State \_\_\_\_\_ Don't know \_\_\_\_\_

C. Country \_\_\_\_\_ Don't know \_\_\_\_\_

2. Please put check marks for his race/ethnicity (check **ALL** that apply).

Look back at the first 2 pages for definitions. Please choose all of the words from those definitions that apply to him and write them below.

A. WHITE \_\_\_\_\_

B. BLACK OR AFRICAN AMERICAN \_\_\_\_\_

C. ASIAN \_\_\_\_\_

D. HISPANIC OR LATINO \_\_\_\_\_

E. EUROPEAN \_\_\_\_\_

F. MIDDLE EASTERN \_\_\_\_\_

G. FAR EAST ASIAN \_\_\_\_\_

H. SOUTHEAST ASIAN \_\_\_\_\_

I. INDIAN SUBCONTINENT \_\_\_\_\_

J. NORTH AFRICAN \_\_\_\_\_

K. AFRO-CARIBBEAN \_\_\_\_\_

L. AMERICAN INDIAN OR ALASKA NATIVE \_\_\_\_\_

M. NATIVE HAWAIIAN OR OTHER PACIFIC ISLANDER \_\_\_\_\_

N. OTHER \_\_\_\_\_

If possible please elaborate. If you think there are additional or better terms to describe his race/ethnicity please add them here.

\_\_\_\_\_

\_\_\_\_\_

\_\_\_\_\_

O. DON'T KNOW \_\_\_\_\_
