# Supplementary material for: Sleep and cognitive performance of African-Americans and European-Americans before and during circadian misalignment produced by an abrupt 9-h delay in the sleep/wake schedule
Source: PubMed Central journal article supplement (PMC5658102; doi:10.1371/journal.pone.0186843), 2017-10-26
Supplement: pone.0186843.s002.pdf [file pone.0186843.s002.pdf]

Name: \_\_\_\_\_

Date: \_\_\_\_\_

**HEALTH INFORMATION QUESTIONNAIRE**

1. In general, how would you describe your health?

- Excellent..... 1  
 Good ..... 2  
 Fair ..... 3  
 Poor ..... 4

2. During the past 6 months, have you been hospitalized for any reason?

- Yes..... 1  
 No..... 2

A. If "YES," how many times? \_\_\_\_\_ Times

B. For a TOTAL of how long? \_\_\_\_\_ Days

C. Why were you hospitalized? \_\_\_\_\_

3. During the past month, about how many days of sick leave did you take? \_\_\_\_\_ Days  
(PLEASE WRITE "0" IF NONE)

4. PLEASE INDICATE ABOUT HOW OFTEN YOU USED EACH OF THE FOLLOWING MEDICATIONS DURING THE PAST MONTH:

| Medications                               | Not at all | Less than<br>once a<br>a week | 1-2 times<br>a week | 3-4 times<br>a week | Every day |
|-------------------------------------------|------------|-------------------------------|---------------------|---------------------|-----------|
| a. Aspirin or headache medicine           | 1          | 2                             | 3                   | 4                   | 5         |
| b. Aids for stomach or digestion problems | 1          | 2                             | 3                   | 4                   | 5         |
| c. Laxatives                              | 1          | 2                             | 3                   | 4                   | 5         |
| d. Cough, cold or sinus medicine          | 1          | 2                             | 3                   | 4                   | 5         |
| e. Medicine to pep you up                 | 1          | 2                             | 3                   | 4                   | 5         |
| f. Medication to calm you down            | 1          | 2                             | 3                   | 4                   | 5         |
| g. Prescription medicine:                 |            |                               |                     |                     |           |
| 1. _____<br>(Please specify)              |            | 2                             | 3                   | 4                   | 5         |
| 2. _____<br>(Please specify)              |            | 2                             | 3                   | 4                   | 5         |
| 3. _____<br>(Please specify)              |            | 2                             | 3                   | 4                   | 5         |

5. THE FOLLOWING QUESTIONS CONCERN YOUR BODY FUNCTIONS. PLEASE TRY TO ANSWER EACH QUESTION BY CIRCLING A NUMBER TO INDICATE HOW OFTEN YOU HAVE EXPERIENCED EACH OF THE FOLLOWING ITEMS WITHIN THE PAST YEAR.

|                                                                                                                                       | <u>Never</u> | <u>Occasionally</u> | <u>Frequently</u> | <u>Constantly</u> |
|---------------------------------------------------------------------------------------------------------------------------------------|--------------|---------------------|-------------------|-------------------|
| 1. Intense, irresistible urge to move your legs along with numbness, tingling, pricking, burning, itching, and/or electric shock..... | 1            | 2                   | 3                 | 4                 |
| 2. Uncomfortable sensations in your legs that become worse when resting.....                                                          | 1            | 2                   | 3                 | 4                 |
| 3. Uncomfortable sensations in your legs that are partially, or totally, relieved by movement.....                                    | 1            | 2                   | 3                 | 4                 |
| 4. Increased severity of uncomfortable sensations in your legs in the evening or at night .....                                       | 1            | 2                   | 3                 | 4                 |
| 5. Motor restlessness, unable to stay still.....                                                                                      | 1            | 2                   | 3                 | 4                 |
| 6. Shortness of breath or trouble breathing.....                                                                                      | 1            | 2                   | 3                 | 4                 |
| 7. Frequent colds or sore throats.....                                                                                                | 1            | 2                   | 3                 | 4                 |
| 8. Persistent cough and spitting up sputum.....                                                                                       | 1            | 2                   | 3                 | 4                 |
| 9. Coughing up blood.....                                                                                                             | 1            | 2                   | 3                 | 4                 |
| 10. Fever, chills, and aching all over.....                                                                                           | 1            | 2                   | 3                 | 4                 |
| 11. Hay fever or sinus trouble.....                                                                                                   | 1            | 2                   | 3                 | 4                 |
| 12. Wheezing in your chest.....                                                                                                       | 1            | 2                   | 3                 | 4                 |
| 13. Jaundice, yellow eyes or skin.....                                                                                                | 1            | 2                   | 3                 | 4                 |
| 14. Itching skin, skin rash, allergic skin reactions.....                                                                             | 1            | 2                   | 3                 | 4                 |
| 15. Swollen or painful muscles and joints.....                                                                                        | 1            | 2                   | 3                 | 4                 |
| 16. Back pain.....                                                                                                                    | 1            | 2                   | 3                 | 4                 |
| 17. Pain or stiffness in your arms or legs.....                                                                                       | 1            | 2                   | 3                 | 4                 |
| 18. Tearing or itching of eyes.....                                                                                                   | 1            | 2                   | 3                 | 4                 |
| 19. Persistent numbness or tingling in any part of your body.....                                                                     | 1            | 2                   | 3                 | 4                 |
| 20. Ringing or buzzing in ears.....                                                                                                   | 1            | 2                   | 3                 | 4                 |
| 21. Severe headaches.....                                                                                                             | 1            | 2                   | 3                 | 4                 |
| 22. Fainting spells or dizziness.....                                                                                                 | 1            | 2                   | 3                 | 4                 |
| 23. Nervous or shaking inside.....                                                                                                    | 1            | 2                   | 3                 | 4                 |
| 24. Times when you feel sweaty or trembly.....                                                                                        | 1            | 2                   | 3                 | 4                 |
| 25. Increased urination.....                                                                                                          | 1            | 2                   | 3                 | 4                 |
| 26. Painful urination.....                                                                                                            | 1            | 2                   | 3                 | 4                 |
| 27. Bloody urine.....                                                                                                                 | 1            | 2                   | 3                 | 4                 |

|                                                                          | <u>Never</u> | <u>Occasionally</u> | <u>Frequently</u> | <u>Constantly</u> |
|--------------------------------------------------------------------------|--------------|---------------------|-------------------|-------------------|
| 28. Alarming pain or pressure in your chest.....                         | 1            | 2                   | 3                 | 4                 |
| 29. Pain down your arms.....                                             | 1            | 2                   | 3                 | 4                 |
| 30. "Racing" or pounding heart.....                                      | 1            | 2                   | 3                 | 4                 |
| 31. Leg cramps.....                                                      | 1            | 2                   | 3                 | 4                 |
| 32. Periods of severe fatigue or exhaustion.....                         | 1            | 2                   | 3                 | 4                 |
| 33. Acid indigestion, heartburn, or acid stomach.....                    | 1            | 2                   | 3                 | 4                 |
| 34. Diarrhea for more than a few days.....                               | 1            | 2                   | 3                 | 4                 |
| 35. Gas or gas pains.....                                                | 1            | 2                   | 3                 | 4                 |
| 36. Nausea or vomiting.....                                              | 1            | 2                   | 3                 | 4                 |
| 37. Blood in your bowel movement.....                                    | 1            | 2                   | 3                 | 4                 |
| 38. Constipation.....                                                    | 1            | 2                   | 3                 | 4                 |
| 39. Tight feeling in stomach.....                                        | 1            | 2                   | 3                 | 4                 |
| 40. Bloating or full feeling.....                                        | 1            | 2                   | 3                 | 4                 |
| 41. Feeling of pressure in the neck.....                                 | 1            | 2                   | 3                 | 4                 |
| 42. Hemorrhoids or piles.....                                            | 1            | 2                   | 3                 | 4                 |
| 43. Trouble digesting food.....                                          | 1            | 2                   | 3                 | 4                 |
| 44. Blurred vision.....                                                  | 1            | 2                   | 3                 | 4                 |
| 45. Dryness in the mouth.....                                            | 1            | 2                   | 3                 | 4                 |
| 46. Bleeding gums when brushing teeth.....                               | 1            | 2                   | 3                 | 4                 |
| 47. Stomach pains.....                                                   | 1            | 2                   | 3                 | 4                 |
| 48. Belching.....                                                        | 1            | 2                   | 3                 | 4                 |
| 49. Difficulty with feet and legs when standing for<br>long periods..... | 1            | 2                   | 3                 | 4                 |

6. Within the past 5 years has a doctor ever treated your for, or told you that you had: (please circle)

|                           | <u>No</u> | <u>Yes</u> | <u>(If yes, give<br/>approximate date<br/>when symptoms<br/>first appeared)</u> | <u>Don't know</u> |
|---------------------------|-----------|------------|---------------------------------------------------------------------------------|-------------------|
| 1. Diabetes.....          | 1         | 2          | ____/____<br>Year / Mo.                                                         | 3                 |
| 2. Cancer.....            | 1         | 2          | ____/____<br>Year / Mo.                                                         | 3                 |
| 3. Hernia or rupture..... | 1         | 2          | ____/____<br>Year / Mo.                                                         | 3                 |
| 4. Tuberculosis.....      | 1         | 2          | ____/____<br>Year / Mo.                                                         | 3                 |
| 5. Asthma.....            | 1         | 2          | ____/____<br>Year / Mo.                                                         | 3                 |

|                                                   |   |   |                                             |   |
|---------------------------------------------------|---|---|---------------------------------------------|---|
| 6. "High" blood pressure.....                     | 1 | 2 | <u>      </u> / <u>      </u><br>Year / Mo. | 3 |
| 7. Heart disease.....                             | 1 | 2 | <u>      </u> / <u>      </u><br>Year / Mo. | 3 |
| 8. Arthritis.....                                 | 1 | 2 | <u>      </u> / <u>      </u><br>Year / Mo. | 3 |
| 9. Epilepsy.....                                  | 1 | 2 | <u>      </u> / <u>      </u><br>Year / Mo. | 3 |
| 10. Glaucoma of the eye.....                      | 1 | 2 | <u>      </u> / <u>      </u><br>Year / Mo. | 3 |
| 11. Paralysis, tremor, or shaking.....            | 1 | 2 | <u>      </u> / <u>      </u><br>Year / Mo. | 3 |
| 12. Kidney or bladder trouble.....                | 1 | 2 | <u>      </u> / <u>      </u><br>Year / Mo. | 3 |
| 13. Lung or breathing problems.....               | 1 | 2 | <u>      </u> / <u>      </u><br>Year / Mo. | 3 |
| 14. Stroke.....                                   | 1 | 2 | <u>      </u> / <u>      </u><br>Year / Mo. | 3 |
| 15. Anemia.....                                   | 1 | 2 | <u>      </u> / <u>      </u><br>Year / Mo. | 3 |
| 16. Gall bladder, liver, or pancreas trouble..... | 1 | 2 | <u>      </u> / <u>      </u><br>Year / Mo. | 3 |
| 17. Thyroid trouble or goiter.....                | 1 | 2 | <u>      </u> / <u>      </u><br>Year / Mo. | 3 |
| 18. Insomnia.....                                 | 1 | 2 | <u>      </u> / <u>      </u><br>Year / Mo. | 3 |
| 19. Gastritis.....                                | 1 | 2 | <u>      </u> / <u>      </u><br>Year / Mo. | 3 |
| 20. Colitis.....                                  | 1 | 2 | <u>      </u> / <u>      </u><br>Year / Mo. | 3 |
| 21. Stomach ulcer.....                            | 1 | 2 | <u>      </u> / <u>      </u><br>Year / Mo. | 3 |

7. During a typical week, on approximately how many days do you drink alcoholic beverages? \_\_\_\_\_Days  
(Mark 0 if you do not drink alcoholic beverages)

A. If you drink, do you ever drink on those days when you work?

Yes.....1

No.....2

B. IF "YES": Do you normally drink...(Circle all that apply)

Before going to work..... 1

After finishing work..... 2

During lunch breaks..... 3

During rest breaks when at work.... 4

8. On those days when you do drink, about how many of each of the following do you usually drink:  
(Mark 0 if you do not drink alcoholic beverages)

a. Bottles of beer \_\_\_\_\_ Bottles

b. Glasses of wine \_\_\_\_\_ Glasses

c. Shots of liquor (shot = 1½ oz.) \_\_\_\_\_ Shots

9. Would you say that the amount of alcohol you have been drinking late has...
- Increased..... 1
  - Decreased.....2
  - Remained about the same..... 3
  - Don't drink..... 4
10. Would you say that you use alcohol to help you get to sleep?
- Frequently..... 1
  - Occasionally.....2
  - Seldom..... 3
  - Never.....4
11. On an average day, how many of each of the following do you smoke? (Mark 0 if you do NOT smoke)
- a. Cigarettes        \_\_\_\_\_Cigarettes
  - b. Cigars            \_\_\_\_\_Cigars
  - c. Pipefuls of tobacco   \_\_\_\_\_Pipefuls
