# Supplementary material for: Sleep and cognitive performance of African-Americans and European-Americans before and during circadian misalignment produced by an abrupt 9-h delay in the sleep/wake schedule
Source: PubMed Central journal article supplement (PMC5658102; doi:10.1371/journal.pone.0186843), 2017-10-26
Supplement: pone.0186843.s003.pdf [file pone.0186843.s003.pdf]

## FOR WOMEN ONLY

The purpose of this questionnaire is to give us information about your menstrual cycle, which may affect your levels of melatonin.

Name \_\_\_\_\_ Date \_\_\_\_\_

1. Have you ever had menstrual periods?

Yes \_\_\_\_\_ No \_\_\_\_\_

**If NO**, then thank you, you don't have to answer any more questions.

2. Have you ever had surgery that caused your periods to stop permanently (such as removal of your ovaries)?

Yes \_\_\_\_\_ No \_\_\_\_\_

**If YES**, then thank you, you don't have to answer any more questions.

3. Have you ever experienced unusual breast discharge?

Yes \_\_\_\_\_ No \_\_\_\_\_

**If YES**, then thank you, you don't have to answer any more questions.

4. Are you pregnant? Yes \_\_\_\_\_ No \_\_\_\_\_

**If YES**, then thank you, you don't have to answer any more questions.

5. Are you trying to get pregnant? Yes \_\_\_\_\_ No \_\_\_\_\_

**If YES**, then thank you, you don't have to answer any more questions.

6. Have you ever tried to get pregnant without success?

Yes \_\_\_\_\_ No \_\_\_\_\_

7. Have you ever been pregnant?

Yes \_\_\_\_\_ No \_\_\_\_\_

**If YES**, how long ago? \_\_\_\_\_

(If less than 12 months ago, then thank you, you don't have to answer any more questions).

8. Are you currently breast feeding?

Yes \_\_\_\_\_ No \_\_\_\_\_

**If YES**, then thank you, you don't have to answer any more questions.

9. Are you taking birth control pills? Yes \_\_\_\_\_ No \_\_\_\_\_(if NO, skip to question #10).

**If YES**, Name of prescription \_\_\_\_\_

Date you started the last box of pills \_\_\_\_\_

Day of week you start your pills \_\_\_\_\_

For how many months or years have you been taking birth control pills? \_\_\_\_\_

Please skip to **question #13**.

10. Have you taken birth control pills in the past? Yes \_\_\_\_\_ No \_\_\_\_\_

**If YES**, When did you stop using them? \_\_\_\_\_

11. Are your menstrual cycles regular (i.e. can you usually predict the date of your next period)?

Yes \_\_\_\_\_ No \_\_\_\_\_

Comments: \_\_\_\_\_

\_\_\_\_\_

\_\_\_\_\_

12. What is the average length of your menstrual cycle (i.e. the number of days between the start of one period and the start of the next period. 28 days is a typical length)?

\_\_\_\_\_

13. When did your last period start? Date \_\_\_\_\_ Day of Week \_\_\_\_\_

14. If you have kept track of the dates of your menstrual periods, please list the last 5 here:

\_\_\_\_\_

\_\_\_\_\_

\_\_\_\_\_

15. Are you taking any other medications that contain hormones (e.g. hormonal patch, injections, or fertility drugs)? Yes \_\_\_\_\_ No \_\_\_\_\_

Please provide details \_\_\_\_\_

16. Are you taking any nutritional supplements or alternative medications?

Yes \_\_\_\_\_ No \_\_\_\_\_

**If YES**, then please list them: \_\_\_\_\_

17. Have you ever had a tubaligation (had your “tubes tied”)?

Yes \_\_\_\_\_ No \_\_\_\_\_

**If YES**, then when did you have it done? \_\_\_\_\_

18. The following questions are for women over 40 years old. If you are younger than 40, then please skip to question #25. If you are over 40 years, please go to question #19 and complete the entire questionnaire.

19. Are you taking a contraceptive?

Yes \_\_\_\_\_ No \_\_\_\_\_

**If YES**, then thank you, you don’t have to answer any more questions.

**If NO**, then please go to question #20.

20. Do you or your doctor think that

- a) you are going through menopause.
- b) you are menopausal.
- c) Neither.

21. Are you taking supplemental or replacement hormones for menopause or symptoms of menopause, such as hot flashes? Yes \_\_\_\_\_ Yes, but I stopped \_\_\_\_\_ No, never took them \_\_\_\_\_

22. Have you noticed any irregularity in your menstrual periods, such as the following:

- |                                               |                                |
|-----------------------------------------------|--------------------------------|
| Bleeding between your periods                 | Yes _____ No _____ Maybe _____ |
| A change in the length of your periods        | Yes _____ No _____ Maybe _____ |
| A change in the interval between your periods | Yes _____ No _____ Maybe _____ |
| A change in the heaviness of your periods     | Yes _____ No _____ Maybe _____ |

23. In your family, at what age did your mother, aunts and other close female relatives have menopause?

\_\_\_\_\_ years \_\_\_\_\_ don’t know

24. Have you noticed an unusual physical or emotional changes recently (such as crying spells, depression)?

Yes \_\_\_\_\_ No \_\_\_\_\_ Maybe \_\_\_\_\_

**If YES** please provide details \_\_\_\_\_

25. Do you usually feel bad in the week before your period

(sometimes called PMS, or premenstrual syndrome)?

Yes \_\_\_\_\_ No \_\_\_\_\_ Maybe \_\_\_\_\_

Please check any of the following that you usually notice in the week before your period:

- Feel depressed, hopeless, worthless or guilty
- Feel anxious or tense
- Have mood swings or your feelings are easily hurt
- Feel angry or irritable
- Have less interest in work, school, friends or hobbies
- Have difficulty concentrating
- Feel tired
- Have an increased appetite or overeating
- Sleep more or less than usual
- Feel overwhelmed and unable to cope
- Have breast tenderness, weight gain, or headache

**Do any of these symptoms:**

A. Interfere with your productivity at work, school, home or in your daily routine?

Yes \_\_\_\_\_ No \_\_\_\_\_ Maybe \_\_\_\_\_

B. Cause you to avoid or participate less in hobbies or social activities?

Yes \_\_\_\_\_ No \_\_\_\_\_ Maybe \_\_\_\_\_

C. Interfere with your relationships with others?

Yes \_\_\_\_\_ No \_\_\_\_\_ Maybe \_\_\_\_\_
