# Supplementary material for: Sleep and cognitive performance of African-Americans and European-Americans before and during circadian misalignment produced by an abrupt 9-h delay in the sleep/wake schedule
Source: PLoS One. 2017 Oct 26;12(10):e0186843. doi: 10.1371/journal.pone.0186843 (PMC5658102; doi:10.1371/journal.pone.0186843)
Supplement: S1 Excel Data File — (XLSX) [file pone.0186843.s004.xlsx]

## Sheet: Paech et al Sleep Data
ID	Ancestry	Study Phase	Study Day	Columbia Jet Lag scale	Total Sleep Time (Sleep Logs)	Total Sleep Time (Actigraphy)	EMA (Actigraphy)
243	1	1	3	0	7.41667	6.4	0.05
243	1	1	4	3	7.5	6.05	0.216667
243	1	1	5	0	7.05	5.06667	0.583333
243	1	2	6	9	6.28333	4.96667	1.06667
243	1	2	7	11	5.45	4.25	0.816667
243	1	2	8	11	6.5	4.53333	1.28333
244	1	1	3	2	7.25	6.98333	0.15
244	1	1	4	1	7.58333	6.85	0.0666667
244	1	1	5	3	7.63333	7.03333	0.0666667
244	1	2	6	9	7.71667	7.33333	0.116667
244	1	2	7	3	7.86667	6.9	0.1
244	1	2	8	3	7.61667	6.65	0.383333
245	1	1	3	4	7.53333	6.56667	0.416667
245	1	1	4	2	7.75	6.23333	0.0333333
245	1	1	5	0	7.75	5.85	0.383333
245	1	2	6	5	7.5	6.15	0.133333
245	1	2	7	4	7.4	5.71667	0.8
245	1	2	8	5	6.8	5.25	0.85
246	2	1	3	0	7.33333	6.31667	0.0833333
246	2	1	4	0	7.5	6.11667	0.0666667
246	2	1	5	3	7.91667	6.2	0.0333333
246	2	2	6	3	7	6.2	0.0333333
246	2	2	7	7	7.66667	5.58333	0.466667
246	2	2	8	5	7.75	5.56667	0.25
247	1	1	3	5	7.5	6.9	0.05
247	1	1	4	12	7.75	6.61667	0.116667
247	1	1	5	10	7.25	6.53333	0.116667
247	1	2	6	6	7.5	6.66667	0.166667
247	1	2	7	6	7.58333	6.31667	0.0166667
247	1	2	8	8	7.28333	6.3	0.0333333
248	2	1	3	0	7.91667	7.08333	0.0333333
248	2	1	4	4	7.91667	6.85	0.0333333
248	2	1	5	0	7.83333	6.93333	0.0666667
248	2	2	6	0	7.5	7.11667	0.0333333
248	2	2	7	0	7.75	6.93333	0.0666667
248	2	2	8	0	7.96667	7.13333	0.0833333
249	1	1	3	5	7.58333	5.95	0.0166667
249	1	1	4	10	7.41667	6.53333	0
249	1	1	5	0	7.91667	6.56667	0
249	1	2	6	9	6.98333	6.43333	0.183333
249	1	2	7	15	6.41667	6.08333	0.4
249	1	2	8	9	6.91667	5.76667	0.583333
250	2	1	3	0	7.83333	7.03333	0.0166667
250	2	1	4	0	7.83333	7.16667	0
250	2	1	5	1	7.83333	6.95	0
250	2	2	6	4	7.96667	6.86667	0.0833333
250	2	2	7	1	7.95	6.95	0.133333
250	2	2	8	1	7.95	6.98333	0.0166667
251	1	1	3	3	7.88333	7.48333	0
251	1	1	4	3	7.83333	7.46667	0.0166667
251	1	1	5	2	6.91667	6.83333	0.05
251	1	2	6	8	6.25	6.98333	0.0166667
251	1	2	7	5	5.91667	5.98333	1.15
251	1	2	8	5	7.58333	7.3	0.1
252	1	1	3	2	7.63333	6.55	0.25
252	1	1	4	2	7.33333	6.15	2.01667
252	1	1	5	1	7.5	6.08333	0.0333333
252	1	2	6	25	4.41667	3.35	3.56667
252	1	2	7	15	4.66667	3.75	3.28333
252	1	2	8	7	5.75	4.76667	2.13333
253	2	1	3	9	7.75	7.05	0.0333333
253	2	1	4	7	7.75	7	0.0333333
253	2	1	5	5	7.66667	6.95	0.0333333
253	2	2	6	12	7.91667	7.38333	0.0166667
253	2	2	7	12	7.58333	7.35	0.0166667
253	2	2	8	10	6.66667	6.38333	0.116667
254	2	1	3	0	4.16667	4.26667	1.2
254	2	1	4	5	7.61667	6.36667	0.0333333
254	2	1	5	0	7.25	5.78333	0.0833333
254	2	2	6	9	7.58333	5.83333	0.0833333
254	2	2	7	5	7.33333	5.81667	0.0833333
254	2	2	8	4	6.75	5.7	0.0333333
255	1	1	3	1	5.93333	4.86667	1.43333
255	1	1	4	10	7.81667	6.81667	0.266667
255	1	1	5	5	7.51667	5.5	0.933333
255	1	2	6	13	6.88333	5.2	0.433333
255	1	2	7	13	7.46667	6.41667	0.25
255	1	2	8	12	7.5	5.95	0.1
256	2	1	3	7	7.33333	5.38333	0.0166667
256	2	1	4	4	7	5.66667	0.0166667
256	2	1	5	4	7.66667	5.21667	0.1
256	2	2	6	6	7.91667	6.26667	0.2
256	2	2	7	7	7.41667	5.68333	0.666667
256	2	2	8	8	7.5	6.03333	0.35
257	2	1	3	3	7.88333	7.28333	0.0333333
257	2	1	4	3	7.96667	7.41667	0.0333333
257	2	1	5	1	7.71667	6.55	0.0333333
257	2	2	6	6	5.98333	6.83333	0.15
257	2	2	7	7	6.58333	7.11667	0.0333333
257	2	2	8	4	6.56667	6.81667	0.0166667
258	1	1	3	0	7.65	6.2	0.233333
258	1	1	4	2	7.56667	5.96667	0.0666667
258	1	1	5	4	6.93333	6.43333	0.0666667
258	1	2	6	8	6.73333	6.35	0.583333
258	1	2	7	7	5	5.63333	0.55
258	1	2	8	6	6.96667	6.98333	0.116667
260	1	1	3	4	7.66667	6.55	0.0166667
260	1	1	4	2	7.83333	5.85	0.133333
260	1	1	5	2	7.58333	6.71667	0.0833333
260	1	2	6	15	7.33333	5.83333	0.1
260	1	2	7	7	5.93333	5.61667	0.933333
260	1	2	8	12	7.71667	5.88333	0.0333333
261	1	1	3	1	7.91667	7.08333	0.0166667
261	1	1	4	1	7.91667	7.15	0.0833333
261	1	1	5	1	7.91667	7.21667	0.0166667
261	1	2	6	16	7.91667	7.2	0.0166667
261	1	2	7	6	7.91667	7.08333	0
261	1	2	8	5	7.91667	7.3	0
262	1	1	3	6	5.25	5.63333	0.0166667
262	1	1	4	3	7.66667	6.63333	0.0833333
262	1	1	5	4	7.5	5.95	0.0333333
262	1	2	6	7	6.83333	6.5	0
262	1	2	7	9	7.58333	6.45	0.15
262	1	2	8	4	7.5	6.16667	0.333333
263	2	1	3	5	7.91667	7.06667	0
263	2	1	4	1	7.66667	6.85	0
263	2	1	5	0	7.75	7	0
263	2	2	6	9	7.91667	7.36667	0
263	2	2	7	5	6.41667	5.68333	1.2
263	2	2	8	6	7.91667	7.28333	0
265	1	1	3	4	7.58333	7.26667	0.0333333
265	1	1	4	5	7.81667	7.48333	0.0333333
265	1	1	5	1	7.91667	7.48333	0.0333333
265	1	2	6	8	4.91667	6.58333	2.82
265	1	2	7	5	4.25	6.41667	3.4
265	1	2	8	7	5.75	7.13333	0
266	1	1	3	2	6.45	5.63333	0.5
266	1	1	4	1	7.75	6.08333	0.0333333
266	1	1	5	1	6.56667	5.81667	0.116667
266	1	2	6	8	6.75	6.03333	0.0333333
266	1	2	7	5	6.45	5.46667	0.0666667
266	1	2	8	2	6.83333	5.95	0.366667
267	2	1	3	3	7.25	6.05	0.3
267	2	1	4	2	7.31667	5.26667	0.05
267	2	1	5	0	7.91667	5.53333	0.3
267	2	2	6	15	7.41667	5.73333	0.316667
267	2	2	7	13	5.28333	5.1	0.25
267	2	2	8	9	5.98333	5.4	0.116667
269	1	1	3	0	7.58333	6.28333	0.0166667
269	1	1	4	0	7.75	5.4	0.0833333
269	1	1	5	3	7.75	5.56667	0.05
269	1	2	6	8	7.55	5.25	1.3
269	1	2	7	1	7.7	5.88333	0.0166667
269	1	2	8	2	6.71667	4.88333	1.48333
270	2	1	3	3	7.58333	6.46667	0.0333333
270	2	1	4	3	7.58333	6.23333	0.266667
270	2	1	5	6	7.58333	6.21667	0.0166667
270	2	2	6	7	7.73333	6.85	0.0333333
270	2	2	7	7	7.58333	6.81667	0.0333333
270	2	2	8	8	7.66667	6.26667	0.0333333
271	1	1	3	1	7.83333	7.05	0.0166667
271	1	1	4	0	7.75	7.31667	0.1
271	1	1	5	1	7.5	7.08333	0.0166667
271	1	2	6	2	5.08333	4.7	2.9
271	1	2	7	1	7.33333	6.45	0.366667
271	1	2	8	1	7.25	5.88333	2.57
272	2	1	3	0	7.5	6.88333	0.0333333
272	2	1	4	0	7.58333	6.9	0.0666667
272	2	1	5	0	7.5	6.51667	0.133333
272	2	2	6	9	7.16667	6.5	0.0166667
272	2	2	7	5	7.33333	6.48333	0.25
272	2	2	8	6	7.25	6.71667	0.0166667
273	2	1	3	11	7.33333	6.93333	0.0333333
273	2	1	4	9	7.58333	7.25	0.0166667
273	2	1	5	12	7.66667	7.01667	0.15
273	2	2	6	16	5.8	5.35	1.86667
273	2	2	7	12	6.91667	6.18333	1.03333
273	2	2	8	5	7.33333	6.16667	0.0833333
274	2	1	3	10	7.91667	6.9	0
274	2	1	4	9	7.58333	6.95	0.0666667
274	2	1	5	13	7.83333	7.2	0
274	2	2	6	11	5.66667	6.98333	0
274	2	2	7	7	6.58333	6.98333	0.116667
274	2	2	8	13	5.41667	6.8	0
276	1	1	3	5	6.65	5.56667	1.03333
276	1	1	4	0	7.91667	6.28333	0.183333
276	1	1	5	2	7.71667	6.85	0.316667
276	1	2	6	9	7.85	6.9	0.166667
276	1	2	7	12	5.5	5.46667	3.05
276	1	2	8	6	8	6.66667	0.1
277	2	1	3	3	7.58333	6.65	0.4
277	2	1	4	11	7	6.58333	0.0333333
277	2	1	5	5	7.16667	6.7	0.0833333
277	2	2	6	17	4.91667	6.13333	0.0666667
277	2	2	7	12	5.5	6.78333	0.25
277	2	2	8	11	4.41667	6.5	0.2
278	2	1	3	4	7.5	6.38333	0.133333
278	2	1	4	2	7.25	6.86667	0.05
278	2	1	5	2	6.88333	6.68333	0.05
278	2	2	6	5	5.75	5.55	0.816667
278	2	2	7	5	4.83333	4.63333	1.95
278	2	2	8	1	5.96667	5.95	0.483333
279	1	1	3	1	6.75	5.35	0.216667
279	1	1	4	0	6.5	5.01667	0.333333
279	1	1	5	1	7	6	0.133333
279	1	2	6	5	4.33333	4.96667	0.05
279	1	2	7	1	5	5.28333	0.133333
279	1	2	8	1	5.61667	5.76667	0.233333
281	2	1	3	0	7.61667	5.6	0.183333
281	2	1	4	0	7.83333	6.08333	0.0166667
281	2	1	5	0	7.33333	6.15	0.05
281	2	2	6	15	5.33333	5.26667	0.35
281	2	2	7	10	4.33333	4.55	3.96667
281	2	2	8	10	6.58333	4.85	1.55
282	1	1	3	6	7.5	.	.
282	1	1	4	6	7.91667	.	.
282	1	1	5	4	7.91667	.	.
282	1	2	6	5	7.81667	.	.
282	1	2	7	6	6.53333	.	.
282	1	2	8	5	7.66667	.	.
283	2	1	3	16	7.96667	.	.
283	2	1	4	6	7.81667	.	.
283	2	1	5	6	7.48333	.	.
283	2	2	6	23	5.48333	.	.
283	2	2	7	25	4.65	.	.
283	2	2	8	29	4.65	.	.
285	2	1	3	1	7	7.58333	0.0166667
285	2	1	4	2	7.08333	7.28333	0.0166667
285	2	1	5	2	7.16667	7.31667	0.433333
285	2	2	6	3	6	6.55	0.866667
285	2	2	7	4	4.16667	6.76667	0.0333333
285	2	2	8	0	3.66667	6.78333	0.15
286	1	1	3	3	7.75	6.85	0.133333
286	1	1	4	1	7.83333	6.51667	0.0166667
286	1	1	5	0	7.91667	6.6	0.0166667
286	1	2	6	4	7.73333	6.48333	0.183333
286	1	2	7	1	7.91667	6.8	0.15
286	1	2	8	0	7.41667	6.45	0.15
287	1	1	3	6	6.53333	6.25	0.0333333
287	1	1	4	1	7.5	6.5	0.0833333
287	1	1	5	2	6.08333	6.06667	0.0333333
287	1	2	6	6	3.1	5.11667	0.8
287	1	2	7	1	5.85	5.76667	0.0166667
287	1	2	8	1	6.1	6.28333	1.18333
289	1	1	3	3	7.5	6.41667	0
289	1	1	4	6	7.75	6.71667	0.0166667
289	1	1	5	4	7.66667	6.53333	0.0166667
289	1	2	6	7	7.83333	6.75	0.0166667
289	1	2	7	1	7.83333	6.75	0.0333333
289	1	2	8	3	7.83333	6.66667	0.05
290	2	1	3	3	7.5	7.28333	0.0166667
290	2	1	4	2	7.16667	7.08333	0.0166667
290	2	1	5	5	5.58333	6.93333	0.05
290	2	2	6	10	4.91667	6.56667	0.0166667
290	2	2	7	15	3.91667	6.8	0.0166667
290	2	2	8	1	6.16667	6.71667	0.05
291	1	1	3	5	7.5	7.38333	0.0166667
291	1	1	4	7	7.75	7.26667	0.1
291	1	1	5	5	7.91667	7.23333	0.0166667
291	1	2	6	6	7.75	7.11667	0.183333
291	1	2	7	2	6.91667	6.66667	0.466667
291	1	2	8	12	7.91667	7.58333	0.0666667
292	2	1	3	7	6.3	5.98333	0.216667
292	2	1	4	5	5.41667	5.75	0.0166667
292	2	1	5	9	7.16667	5.98333	0.166667
292	2	2	6	13	6.31667	5.48333	1.3
292	2	2	7	14	4.58333	5.33333	0.85
292	2	2	8	9	5.85	5.36667	1.41667
294	2	1	3	9	7.83333	6.95	0.116667
294	2	1	4	10	7.75	6.78333	0.0166667
294	2	1	5	11	7.83333	6.7	0.0833333
294	2	2	6	14	7.58333	7.31667	0.0333333
294	2	2	7	18	5	6.88333	0.0166667
294	2	2	8	15	6	6.93333	0.0666667
295	2	1	3	17	6.66667	6.68333	0.0333333
295	2	1	4	19	7.25	6.88333	0.0333333
295	2	1	5	12	7	6.61667	0.0333333
295	2	2	6	13	7.41667	7	0.0333333
295	2	2	7	17	6.91667	6.11667	1.05
295	2	2	8	9	7.91667	6.86667	0.15

## Sheet: Variable List (Sleep)
Column	Variable Name	Definition
A	ID	Participant ID
B	Race	1=African-American
		2=European-American
C	Study Phase	1=Baseline (aligned)
		2=Delayed (misaligned)
D	Study Day	Day of study, refer to Fig 1 (2, 3, 4=Baseline (aligned) days; 6,7,8=Delayed (misaligned) days)
E	Columbia Jet Lag scale	Total Columbia Jet Lag scale score from Spitzer RL et al. Am J Psychiatry. 1999;156:1392-6.
F	Total Sleep Time (Sleep Logs)	Total Sleep Time (hours) as determined by self-reported sleep logs
G	Total Sleep Time (Actigraphy)	Total Sleep Time (hours) as determine by actigraphy
H	EMA (Actigraphy)	Early Morning Awakening (hours) determined by actigraphy

## Sheet: Paech et al Performance Data
ID	Phase	Ancestry	Hours after baseline wake time	Stanford Sleepiness Scale	SRT Median RT	SRT Lapses	CSL % correct	CSD % correct	GNG d-prime	MTH % correct	M2S % correct	Pro RT SR	Pro RT Median RT	Mood - Vigor	Mood- Happiness	Mood- Depression	Mood- Anger	Mood- Fatigue	Mood- Anxiety	Mood- Restlessness
243	1	1	2	3	240	0	97.2222	100	4.12564	95	90	0	524.5	2.75	3.6	0	0	1.5	0	0
243	1	1	5	2	231	0	98.6111	91.6667	2.60441	95	95	6	585	3.75	4.4	0	0.25	1.25	0	0
243	1	1	8	1	240.5	2	95.8333	58.3333	3.54433	100	100	10	676.5	4.75	5	0	0	0.75	0	0
243	1	1	11	1	204.5	0	98.6111	80.5556	2.82471	100	95	1	468	5	5	0	0	0.25	0	0
243	1	1	14	2	200	0	95.8333	94.4444	2.60441	95	100	1	520	4	4.2	0	0	1.75	0	0
243	1	1	2	2	209	0	98.6111	88.8889	3.3614	100	100	0	514.5	4	4.2	0	0	0	0	0
243	1	1	5	1	218.5	0	95.8333	80.5556	2.9425	100	100	1	516	5	5	0	0	0	0	0
243	1	1	8	1	238.5	0	95.8333	75	2.60441	80	100	8	642.5	5	5	0	0	0	0	0
243	1	1	11	2	204.5	0	98.6111	88.8889	2.60441	100	100	2	503.5	4	4.6	0	0	0.5	0	0
243	1	1	14	3	213	0	98.6111	75	2.52142	95	100	1	550	4	5	0	0	1	0	0
243	2	1	11	3	209	0	98.6111	100	3.3614	100	100	0	498.5	3.75	3.2	0.5	0.75	0.5	0	0.5
243	2	1	14	2	221.5	1	97.2222	91.6667	3.06847	95	100	2	514	3.75	3	0	0.75	0.5	0	1
243	2	1	17	3	219	0	93.0556	86.1111	2.82471	95	100	1	567	3	3.2	0	0	1	0	0
243	2	1	20	4	259.5	9	95.8333	61.1111	1.96485	95	90	12	686.5	3	3.2	0	0	2.75	0	0
243	2	1	23	5	319	28	95.8333	66.6667	1.48763	90	85	7	603	2	2.2	0	0.75	3.75	0	1.5
243	2	1	11	2	221.5	1	97.2222	97.2222	3.12321	95	100	1	527	3.75	2.6	0	1.5	1	0	1
243	2	1	14	3	207.5	0	97.2222	86.1111	4.70497	90	100	3	518	4	4	0	0	1	0	0
243	2	1	17	2	213	0	95.8333	88.8889	2.82471	95	100	10	635	3	3	0	0	1.25	0	0
243	2	1	20	3	245	5	94.4444	66.6667	3.12321	100	100	5	602	3	3	0	0	1.25	0	0
243	2	1	23	6	261	8	86.1111	63.8889	1.37311	95	90	10	635	2	2.6	0	0	3.5	0	0
244	1	1	2	1			97.2222	94.4444	4.78796	100	100	3	484	3.75	5	0	0	0.5	1	0.5
244	1	1	5	1			97.2222	83.3333	4.12564	100	90	4	555.5	4	5.2	0	0	1	0.666667	1
244	1	1	8	4			94.4444	72.2222	3.69399	95	100	4	528	3.25	4.8	0	0	1.75	1	0.5
244	1	1	11	4			98.6111	75	4.12564	100	100	4	511	3	5	0	0	1.5	1.33333	1
244	1	1	14	4			97.2222	75	3.12321	85	90	3	522.5	2.5	5	0	0	1.5	1	0
244	1	1	2	5			97.2222	80.5556	1.63665	100	95	3	488.5	2.5	4.2	0	0	2	0.666667	1.5
244	1	1	5	4			93.0556	66.6667	3.27841	100	90	3	506	3.25	5.2	0	0	1.25	0.666667	0.5
244	1	1	8	2			90.2778	75	2.9425	100	90	4	520.5	3.25	4.4	0	0	1.5	1.33333	1
244	1	1	11	4			91.6667	72.2222	2.35547	85	100	1	467.5	3	4.8	0	0	1	1	1.5
244	1	1	14	4			90.2778	83.3333	2.18137	95	95	2	486.5	2.5	4.8	0	0.25	1.25	1	1
244	2	1	11	4			91.6667	94.4444	2.0503	100	90	3	487	3.25	3.2	0	3	1	2.33333	4
244	2	1	14	4			91.6667	97.2222	2.98548	85	95	3	506	2.75	3	0	1.5	2	1.66667	2.5
244	2	1	17	5			94.4444	52.7778	1.72961	100	95	5	528	2.25	4	0	1	4	1.33333	2
244	2	1	20	6			93.0556	80.5556	3.69399	95	90	2	495	2.75	4	0	0.75	3.5	2	1
244	2	1	23	6			97.2222	61.1111	1.72961	95	100	5	496.5	1.75	3.2	0	0.5	3	1.33333	2
244	2	1	11	4			80.5556	52.7778	1.85276	95	100	3	481	2.75	3.4	0	2	2	2	2.5
244	2	1	14	5			83.3333	30.5556	2.35547	95	95	1	496	2.5	3	0.5	0.75	2	2.33333	2.5
244	2	1	17	6			88.8889	41.6667	2.16239	90	95	1	474	3.25	3.6	0	0.5	2.5	1.66667	3
244	2	1	20	6			61.1111	36.1111	0.0306099	90	95	3	528	1.75	3.2	0	0.75	3.5	1.66667	3
244	2	1	23	7			81.9444	33.3333	1.17232	85	95	1	452	2.25	3	0	0.75	3	1.66667	2
245	1	1	2	2	304	0	95.8333	91.6667	2.41562	100	95	7	455.5	3.5	5.8	0	0	0.5	0	1
245	1	1	5	2	325	1	97.2222	80.5556	2.62963	100	90	1	392.5	3.25	5.2	0	0	0.5	0	0
245	1	1	8	2	311	2	95.8333	77.7778	3.12321	95	95	2	419	2.75	5.2	0	0	0.75	0	0.5
245	1	1	11	1	308.5	2	95.8333	77.7778	3.2062	95	100	2	390	3.5	5.6	0	0	0	0	0.5
245	1	1	14	4	346	5	97.2222	75	3.06847	90	95	7	437.5	1.25	5.4	0	0	2.25	0	1.5
245	1	1	2	1	315.5	0	95.8333	80.5556	2.29346	90	90	2	392	4	5.8	0	0	0.25	0	1
245	1	1	5	2	296	0	98.6111	83.3333	1.432	95	95	3	408	2.75	5.6	0.5	0	0.25	0	0.5
245	1	1	8	1	288	1	93.0556	86.1111	1.31421	85	100	3	370	3	6	0	0	0	0	0.5
245	1	1	11	2	296	2	95.8333	86.1111	2.49861	100	100	5	429	2.25	5.6	0	0	0.75	0	0.5
245	1	1	14	1	303	0	87.5	50	2.52142	85	100	1	391	3	5.2	0	0	0.25	0.666667	1.5
245	2	1	11	2	287	0	94.4444	97.2222	2.28935	75	100	3	426	2.25	5.8	0.5	0	1.5	0	0.5
245	2	1	14	2	291.5	0	97.2222	97.2222	2.52142	90	100	6	432	1.75	5.8	0.5	0	1	0	0.5
245	2	1	17	1	309	0	93.0556	72.2222	1.71819	95	95	2	396	2.75	6	0	0	0.75	0	0
245	2	1	20	6	342.5	8	93.0556	50	1.41455	100	100	12	483	0.25	4.8	0	0	3.75	0	1.5
245	2	1	23	7	345.5	24	94.4444	58.3333	0.179567	95	100	16	518.5	0	5.8	0	0	4.25	0	0
245	2	1	11	3	294	1	94.4444	83.3333	1.83541	100	95	3	383	0.5	6	0	0	2	0	1
245	2	1	14	3	280	0	97.2222	94.4444	2.58536	90	100	2	407	1.5	5.8	0	0	0.75	0.333333	0.5
245	2	1	17	3	291.5	1	95.8333	88.8889	2.20636	100	95	1	397.5	0.75	6	0	0	1.25	0	1
245	2	1	20	2	324	0	94.4444	72.2222	2.84905	100	100	1	402	1.5	5.8	0	0	0.75	0	0.5
245	2	1	23	6	288.5	2	94.4444	83.3333	2.98548	100	95	2	400.5	0	5.6	0	0	3.25	0	1.5
246	1	2	2	2	287.5	4	98.6111	50	2.20636	95	85	9	672	4	3.2	0	0.25	0.25	0	1.5
246	1	2	5	1	299	6	97.2222	41.6667	1.18314	100	80	1	598	4.5	3.6	0	0	0	0	0
246	1	2	8	2	297	3	95.8333	44.4444	0.34867	100	75	3	584.5	4	2	0	0	0	0.666667	0
246	1	2	11	3	311.5	7	98.6111	41.6667	1.82641	100	80	2	626	2.5	2	0	0	0.25	0	1.5
246	1	2	14	5	325	7	90.2778	50	1.60611	80	75	10	818.5	1	3	0	0	3.25	0.333333	1.5
246	1	2	2	1	277.5	2	95.8333	33.3333	1.82641	95	95	2	507.5	2.75	3.6	0	0	0	2	0
246	1	2	5	1	296	8	94.4444	38.8889	1.21338	100	100	0	544	3.5	3.2	0	0	0	0	0
246	1	2	8	4	298.5	7	91.6667	55.5556	0.64219	85	85	3	694	3	3.2	0	0	2.5	0	0
246	1	2	11	5	320.5	10	97.2222	33.3333	-0.0649832	100	90	0	486	2	3.2	0	0.25	1.75	0	0
246	1	2	14	6	301	2	97.2222	38.8889	0.64219	95	90	0	534	0.5	2.4	0	0.75	3	0	0
246	2	2	11	1	298	5	91.6667	50	0.350589	100	85	2	483	3.75	2.4	0	0.5	0	0	0
246	2	2	14	1	294	4	91.6667	50	-0.106684	100	90	3	577	4.5	2.4	0	0	0	0.666667	2
246	2	2	17	3	302	3	98.6111	41.6667	2.71132	95	95	1	520.5	2	1.8	0	0.5	1.25	0	0
246	2	2	20	4	303.5	6	97.2222	36.1111	1.41455	100	100	0	557	1.25	3	0	0	2.5	0.333333	0.5
246	2	2	23	7	340	20	84.7222	41.6667	0.193072	85	50	5	675	0.5	1.4	0.5	0.75	4.25	0	0.5
246	2	2	11	1	291	1	98.6111	50	1.6523	100	95	2	539	2.5	3	0.5	0	0	1	2
246	2	2	14	1	315	5	98.6111	44.4444	1.52124	100	100	1	516	2.75	3	0	0	0	0.333333	2.5
246	2	2	17	4	323	9	94.4444	36.1111	2.74172	90	90	0	511	1	2.8	0	0.75	2	0	1.5
246	2	2	20	5	296	1	98.6111	38.8889	0.764243	100	85	2	545	1.5	2.4	0	0	2	1	2
246	2	2	23	7	403	32	91.6667	38.8889	0.133724	95	75	3	643	0.5	2.6	0	0.25	3.75	1	0
247	1	1	2	1			93.0556	97.2222	2.74172	80	90	3	460.5	4.25	4	0	0	0	0	0
247	1	1	5	3			80.5556	72.2222	-2.39398	85	80	6	443.5	2.5	3.8	0	0	0.75	0	0
247	1	1	8	3			91.6667	41.6667	-1.14579	90	90	2	454.5	1.5	2.6	0	0	1.25	0	1
247	1	1	11	3			91.6667	58.3333	-0.719622	90	95	2	452	1.25	2.8	0	0	1	0	1.5
247	1	1	14	3			91.6667		-2.39398	20	90	2	422.5	0.5	1.4	0.5	1.25	3.75	0.333333	2
247	1	1	2	3			93.0556	50	0.568507	90	80	5	440	3	3.6	0	0	0	0	0
247	1	1	5	4			84.7222	91.6667	1.38299	90	95	1	453	2.75	2.4	0	0.5	0.5	0.333333	1
247	1	1	8	4			90.2778	97.2222	1.15353	90	95	2	442.5	2.5	3.6	0	0	0.75	0	0
247	1	1	11	3			94.4444	100	-1.70555	90	100	1	434	2.25	3	0	0	1	0	0.5
247	1	1	14	4			90.2778	94.4444	2.98548	95	95	5	461	1.5	2.2	0	0.75	1.75	0	0.5
247	2	1	11	3			95.8333	100	0.536694	90	95	3	453	2.75	3.2	0	0	0	0	0
247	2	1	14	2			94.4444	88.8889	0.0935391	90	100	1	437	3	3	0	0	0	0	0
247	2	1	17	4			93.0556	97.2222	-2.71262	100	95	10	509.5	2.5	3	0	0.25	1.5	0	1
247	2	1	20	5			45.8333		-2.9124	30	100			0.25	0	1	4.5	3.75	2	3.5
247	2	1	23	1			94.4444	94.4444	-2.74021	75	100	5	443	4	3.2	0	0	0	0	0
247	2	1	11	2			91.6667	97.2222	0.601789	90	100	0	432	4	4	0	0	0	0	0
247	2	1	14	2			93.0556	97.2222	1.15911	100	100	7	505.5	3	3	0	0	0	0	0
247	2	1	17	1			91.6667	100	-2.60441	70	90	5	460.5	4	4	0	0	0	0	0
247	2	1	20	1			90.2778	88.8889	-1.48763	90	90	8	483	3	3	0	0	0	0	0
247	2	1	23	1			93.0556	97.2222	-1.6202	100	85	10	473	3	3	0	0	0	0	0
248	1	2	2	1	242.5	3	98.6111	97.2222	2.98548	100	100	6	532	3.75	6	0	0	0.75	0	0
248	1	2	5	2	243.5	1	95.8333	97.2222	3.2062	95	100	2	511	3.75	6	0	0	0.75	0	0
248	1	2	8	2	249	1	98.6111	91.6667	2.98548	100	95	1	468	3.75	6	0	0	0.5	0	0
248	1	2	11	1	251	0	95.8333	97.2222	3.46134	100	90	4	487.5	3.75	6	0	0	0	0	0
248	1	2	14	2	235.5	0	95.8333	94.4444	3.46134	100	100	7	537	3.25	6	0	0	0.5	0	0
248	1	2	2	1	234	0	98.6111	97.2222	2.46756	100	100	3	495	4.25	6	0	0	0	0	0
248	1	2	5	1	239.5	2	97.2222	86.1111	2.98548	100	100	3	510	4	6	0	0	0.25	0	0
248	1	2	8	1	240	0	98.6111	100	3.3614	95	100	3	503	4	6	0	0	0	0	0
248	1	2	11	1	243	0	95.8333	97.2222	3.77697	95	100	2	488	4	6	0	0	0	0	0
248	1	2	14	1	251	0	93.0556	100	4.12564	95	95	1	473	4	6	0	0	0	0	0
248	2	2	11	1	237	0	97.2222	100	4.12564	100	100	2	487.5	5	6	0	0	0	0	0
248	2	2	14	1	236	0	95.8333	97.2222	4.78796	100	95	3	486	4.75	6	0	0	0	0	0
248	2	2	17	1	240	0	97.2222	100	4.12564	95	100	1	437.5	4.5	6	0	0	0	0	0
248	2	2	20	1	231	0	97.2222	100	3.12321	100	100	0	459	4.75	6	0	0	0	0	0
248	2	2	23	3	240	0	94.4444	75	2.77533	100	100	2	463	4	6	0	0	0	0	0
248	2	2	11	1	242	0	97.2222	97.2222	2.98548	95	95	3	490	4	6	0	0	0	0	0
248	2	2	14	1	247	1	94.4444	80.5556	3.77697	95	100	1	463.5	3.25	4.6	0	0	0.5	0	0
248	2	2	17	1	277	4	95.8333	100	4.12564	100	100	0	486.5	2.75	6	0	0	1.5	0	0
248	2	2	20	3	286	0	98.6111	97.2222	3.54433	95	100	14	617	3.25	5.6	0	0	0.5	0	0
248	2	2	23	2	252	0	95.8333	77.7778	3.54433	90	100	1	475.5	5	6	0	0	0.25	0	0
249	1	1	2	1	323	8	95.8333	91.6667	2.60441	90	95	0	434	3.25	4.6	0.5	0	0	0	0
249	1	1	5	3	316	5	95.8333	77.7778	0.552623	100	85	1	467	3	3.4	1	0	-0.25	0.666667	1
249	1	1	8	1	444	32	97.2222	25	0.985598	95	85	5	569	6	6	0	0	0	2	0
249	1	1	11	3	464.5	28	95.8333	36.1111	1.62703	95	90	22	1050	3	4.6	0	0	0	0	0
249	1	1	14	6	455	32	94.4444	55.5556	1.41455	85	95	0	397	1.75	2.2	0	0	2.25	0	2.5
249	1	1	2	1	279.5	0	98.6111	94.4444	2.98548	95	85	0	426.5	3.75	5.2	0	0	0	0	0
249	1	1	5	3	262	0	94.4444	83.3333	3.3614	100	100	1	494	3	4.6	0	0	0.5	0	0
249	1	1	8	1	244.5	0	88.8889	33.3333	4.12564	80	100	0	413.5	4.5	6	0	0	0	0	0
249	1	1	11	4	425	23	79.1667		-1.07597	75	75	1	417.5	3.5	4.4	0	0	0.25	0	0
249	1	1	14	4			77.7778	33.3333	2.07534	100	100	0	457.5	3.25	4.4	0	0	0.75	0	1
249	2	1	11	2	258	3	94.4444	25	3.00426	100	90	2	485	4	5	0	0	0.5	0	1
249	2	1	14	2	381	18	98.6111		1.96737	95	95	1	496.5	4.5	6	0	0	0	0	0
249	2	1	17	3	465	40	97.2222	47.2222	2.28019	100	95	1	495	3.75	4.4	0.5	0.5	1	0	1
249	2	1	20	6			97.2222	88.8889	3.12321	90	90	4	610	2	3	0	2.5	3.25	1	2.5
249	2	1	23	4	506	44	56.9444	38.8889	2.69909	85	75	0	404	3.5	4.2	0	0	0.25	0	1
249	2	1	11	3	419.5	23	93.0556	58.3333	2.20636	85	100	1	433	3.75	5	0	0	1	0	0.5
249	2	1	14	3	501	50	91.6667	50	-0.415573	100	65	13	766	4	5	0	0	0.5	0	1
249	2	1	17	3	509	47	90.2778	33.3333	0.771781	95	85	1	524.5	2.25	2.2	0.5	1.25	2.75	1.33333	3
249	2	1	20	6	776	71	70.8333	30.5556	1.24518	75	80	0	451	2	3	0	0.75	2.25	0	2
249	2	1	23	7	504	42	77.7778		-0.225828	75	60	2	468	2	0.6	1	0.75	4.25	0	3
250	1	2	2	1	319	2	95.8333	97.2222	2.85951	95	95	3	504	4.75	4.6	0	0	0	0	1.5
250	1	2	5	2	303	2	93.0556	100	2.82471	95	100	3	494	4	4.6	0	0	0.75	0	1.5
250	1	2	8	2	329	7	95.8333	88.8889	1.99235	100	100	2	519.5	4	4.2	0	0	0.5	0	1.5
250	1	2	11	2	310.5	4	97.2222	97.2222	2.18355	85	100	5	508.5	3.25	4.2	0	0	1.25	0	1.5
250	1	2	14	3	321	3	98.6111	94.4444	1.99235	85	100	7	511.5	3	4	0	0	2.75	0	1
250	1	2	2	2	338	4	95.8333	100	2.49861	100	95	2	502.5	3.5	4.8	0	0	1.25	0	1.5
250	1	2	5	1	322	5	87.5	86.1111	2.71262	100	95	2	477	5	5.4	0	0	0.25	0	2
250	1	2	8	2	320	5	94.4444	97.2222	2.49861	100	100	1	484	3.5	4.4	0	0	1	0	2
250	1	2	11	3	316	9	94.4444	83.3333	2.71262	100	100	5	509	3	3.8	0	0	2.5	0	1.5
250	1	2	14	3	296	3	93.0556	97.2222	2.49861	90	100	1	470.5	2.25	4.2	0	0	2.75	0	1
250	2	2	11	2	318	5	95.8333	97.2222	2.49861	100	100	6	495.5	3.25	4.2	0	0	2.25	0	1.5
250	2	2	14	2	303	3	98.6111	100	2.71262	100	95	5	446	3.25	4.2	0	0	0.75	0	1.5
250	2	2	17	3	297.5	5	97.2222	97.2222	2.71262	90	85	3	451	3	3.8	0	0	2.5	0	1.5
250	2	2	20	4	325.5	5	95.8333	91.6667	3.77697	100	100	2	484	2	3.4	0.5	0	3.75	0	1.5
250	2	2	23	4	393.5	15	93.0556	58.3333	2.74172	95	90	8	503	1.5	3.2	0	0	4	0	1
250	2	2	11	1	306.5	3	94.4444	100	1.84546	100	100	5	517.5	3.75	4.4	0	0	0.25	0	2
250	2	2	14	1	311	1	95.8333	94.4444	2.39398	95	100	1	499	3.5	4.4	0	0	0.25	0	2
250	2	2	17	2	324	2	91.6667	97.2222	2.18355	90	100	0	470.5	3.25	4	0	0	0.5	0	1.5
250	2	2	20	3	312	3	95.8333	80.5556	2.9425	100	100	0	472	3.25	4	0	0	1.5	0	1.5
250	2	2	23	3	343	8	95.8333	94.4444	2.39398	100	100	7	522	3	4	0	0	1.5	0	1.5
251	1	1	2	2	259.5	1	94.4444	91.6667	2.35547	95	95	7	431	2	2.6	1.5	0	0.5	0	0
251	1	1	5	2	277	1	93.0556	91.6667	3.54433	95	100	4	422.5	1.75	3	2	0	0.5	0	0
251	1	1	8	2	286	0	95.8333	91.6667	3.46134	85	95	1	414	2	1.4	2	2.25	0.25	0	1.5
251	1	1	11	2	283	2	97.2222	94.4444	3.06847	100	95	1	405	2.25	2.4	1.5	2	0	0	0
251	1	1	14	3	261.5	2	95.8333	91.6667	3.54433	100	100	4	417	1.5	2.8	1	0	0.5	0	0
251	1	1	2	2	251	0	94.4444	91.6667	2.60441	95	90	3	400	2	3	1	0	0	0	0
251	1	1	5	1	248	1	93.0556	88.8889	2.39398	85	95	2	419	3.25	3.8	1	0	0	0	0
251	1	1	8	2	261	1	90.2778	91.6667	2.82471	95	95	4	420	1.75	3.8	0.5	0	0	0	0
251	1	1	11	2	271	0	97.2222	97.2222	2.9425	100	90	3	415	3	3.6	1	0	0	0	0
251	1	1	14	2	281.5	0	97.2222	94.4444	2.82471	95	95	2	415	1.5	3	0.5	0	0.25	0	0
251	2	1	11	2	266.5	0	98.6111	94.4444	2.35547	85	95	5	413.5	3.5	3.8	0	0	0.75	0	0
251	2	1	14	1	260.5	0	95.8333	94.4444	3.77697	95	95	6	440	3.5	4	0	0	0	0	0
251	2	1	17	2	273	0	94.4444	86.1111	2.46756	100	90	2	417	2	3.6	0	0	0.5	0	0
251	2	1	20	3	261	0	95.8333	94.4444	2.98548	95	90	3	429.5	1.5	3.2	0	0	0.75	0	0
251	2	1	23	5	311.5	6	93.0556	83.3333	1.72961	85	90	8	477	0.75	2.8	0	0	2.25	0	0
251	2	1	11	2	306	1	93.0556	94.4444	2.71262	100	100	5	422.5	2.5	3.4	0	0	0	0	0
251	2	1	14	2	262.5	1	97.2222	97.2222	3.2062	100	100	7	426	2	3.4	0	0	0.25	0	0
251	2	1	17	2	298	3	94.4444	100	3.54433	100	95	4	405	2.25	3.2	0	0	0	0	0
251	2	1	20	2	269	1	95.8333	91.6667	2.31099	100	100	3	409	1.5	3.4	0	0	0.5	0	0
251	2	1	23	7	327	10	88.8889	77.7778	0.999372	100	85	14	488	0.5	2.8	0	0	3.25	0	0
252	1	1	2	2	320	4	95.8333	83.3333	2.84905	90	90	8	513	2.25	3	0	0	0.5	0	0
252	1	1	5	1	358	14	93.0556	80.5556	3.77697	95	85	4	471	2.5	3	0.5	0.25	0.25	0.333333	0
252	1	1	8	1	354	10	95.8333	80.5556	3.54433	90	85	3	470	2.75	2.8	1	1.5	0.5	2	1
252	1	1	11	2	346	12	97.2222	58.3333	3.2062	90	80	3	478.5	2.25	3	0.5	0	0.75	1	0
252	1	1	14	4	396	25	94.4444	80.5556	3.54433	70	75	4	456.5	1.5	3	0	0	2	1	0
252	1	1	2	1	347	11	95.8333	86.1111	3.54433	85	85	2	412	2.25	3	0	0	0.25	0	0
252	1	1	5	1	368	7	94.4444	75	3.12321	80	80	3	433.5	3	3	0	0	0	0	0
252	1	1	8	1	347.5	8	91.6667	77.7778	2.46756	80	90	1	448	2.25	3	0	0	0	0.333333	0
252	1	1	11	3	370	17	94.4444	86.1111	3.06847	85	80	1	424	1.5	3	0	0	0.75	0.333333	0
252	1	1	14	4	384	21	95.8333	77.7778	2.82471	85	65	2	444	1.5	3	0	0	0.75	1	0
252	2	1	11	4	360	11	94.4444	100	3.7685	80	75	2	459	0.25	2.4	0	0	2	1	2.5
252	2	1	14	6	399	27	97.2222	86.1111	2.67495	90	95	4	430	0.25	1.8	0	0	2.75	0	0
252	2	1	17	6	321	17	90.2778	52.7778	2.35286	90	75	7	517.5	0	2.4	0	0	3	1	3
252	2	1	20	7	428.5	33	91.6667	69.4444	2.83015	90	55	9	517	0	2.4	0	0	4.25	2	3
252	2	1	23	7	352.5	17	94.4444	69.4444	2.16034	90	60	6	504	0	2.4	0	0	5.5	2	3
252	2	1	11	4	324.5	7	88.8889	86.1111	2.82471	95	80	3	434	0.75	1.8	0	0	2	1	1.5
252	2	1	14	3	301	4	91.6667	77.7778	2.40615	80	70	2	445	0.75	2.4	0	0	1.5	0	1.5
252	2	1	17	5	391	17	90.2778	75	3.12321	85	85	1	449	0	1.8	0	0	2	0	0
252	2	1	20	6	338	14	90.2778	55.5556	2.69909	80	70	4	442	0.25	2.4	0	0	3.75	0	0
252	2	1	23	7	351	11	86.1111	55.5556	2.34634	95	60	9	539	0	3	0	0	4.5	0	0
253	1	2	2	2	281.5	2	95.8333	94.4444	0.497215	100	100	1	395	3.25	2.4	4.5	2.75	2	3.33333	3.5
253	1	2	5	2	331	4	93.0556	75	0.99208	100	100	1	377.5	4.5	3.2	3	3	1.25	3.33333	3.5
253	1	2	8	3	309	2	90.2778	77.7778	0.671788	95	95	4	401	2.75	2	4.5	3.75	2.5	3.33333	4
253	1	2	11	2	296.5	6	95.8333	75	0.769489	100	100	3	377	3.5	3.8	2	2.25	2	2	3
253	1	2	14	4	334	4	91.6667	77.7778	0.456419	95	95	7	458	2.5	2.2	2.5	2.75	2.75	2.66667	3.5
253	1	2	2	1	300	2	94.4444	83.3333	0.623745	95	95	4	374.5	3.5	3.4	2.5	2.25	2	2	2.5
253	1	2	5	3	316	6	87.5	77.7778	0.996512	100	95	1	399	2.75	3.2	4.5	3	2.5	3.33333	4
253	1	2	8	1	331	8	91.6667	69.4444	0.716109	95	100	5	419	3	2.8	2.5	3.5	2	3	3.5
253	1	2	11	2	300	4	88.8889	61.1111	0.0870509	80	100	3	406	3.5	2.8	2.5	3	2.25	2.33333	3.5
253	1	2	14	2	325	7	91.6667	80.5556	0.3355	100	100	0	379	3.75	4.2	1.5	2	1	2	3
253	2	2	11	2	277.5	0	90.2778	97.2222	0.709639	90	95	1	384	3.5	3.2	2.5	2.25	2	2.66667	4
253	2	2	14	2	336	2	95.8333	52.7778	1.34977	95	95	2	356	3	3	3	2.75	2	2.66667	4
253	2	2	17	3	293	8	91.6667	52.7778	0.643521	95	90	1	388	3.25	3	2	2.75	2.75	2	3
253	2	2	20	4	321	4	94.4444	69.4444	1.41455	85	95	4	414	2.25	2.6	3	2.25	2.5	2.33333	2.5
253	2	2	23	5	315	5	93.0556	52.7778	1.31801	90	95	4	401	2	2.6	3	2.5	3.75	2.33333	3
253	2	2	11	2	271	0	95.8333	88.8889	0.756993	95	100	2	403	3	2.6	2	2.25	2	2.33333	2.5
253	2	2	14	2	274	2	91.6667	77.7778	0.735833	90	100	2	370	3.25	2.6	2.5	2.5	2	2.33333	2.5
253	2	2	17	2	290.5	1	88.8889	72.2222	1.34977	90	95	3	378	3	2.2	3	2.5	2.25	3	3
253	2	2	20	3	297	3	88.8889	66.6667	0.242255	85	95	1	357	2.75	2.6	2.5	2.25	2.25	2.33333	3
253	2	2	23	5	333	6	87.5	55.5556	0.174596	75	100	5	432	2	2.4	3.5	2.75	3.25	2.33333	2.5
254	1	2	2	2	280.5	2	98.6111	100	2.9425	100	100	0	513	3.5	5	0	0	0.25	0	1.5
254	1	2	5	3	275	0	97.2222	100	2.31099	100	100	7	561	3.5	5	0	0	0.25	0	0.5
254	1	2	8	2	268.5	1	97.2222	100	2.98548	100	100	5	546	3.5	5	0	0	0.25	0	1
254	1	2	11	2	279	1	98.6111	97.2222	2.84905	100	100	3	551	3.5	5	0	0	0.25	0	0.5
254	1	2	14	2	264	2	98.6111	94.4444	2.0503	90	95	4	511	3.5	5	0	0	0.25	0	0
254	1	2	2	2	260.5	0	98.6111	97.2222	3.77697	100	90	2	506.5	4.25	5	0	0	0.25	0	1
254	1	2	5	2	255	3	97.2222	100	4.04266	100	100	0	467.5	4.25	5	0	0	0.25	0	0.5
254	1	2	8	1	256	1	97.2222	100	3.06847	85	100	5	516	5	5.8	0	0	0	0	1.5
254	1	2	11	2	243	0	98.6111	100	2.35547	95	95	3	516	4.25	5	0	0	0.25	0	0.5
254	1	2	14	2	255	2	97.2222	94.4444	3.69399	95	85	2	529	3.5	5	0	0	0.25	0	0
254	2	2	11	2	258	1	97.2222	97.2222	3.27841	95	95	0	429.5	4.25	4.4	0	0	0	0	0.5
254	2	2	14	2	264.5	0	98.6111	97.2222	3.77697	100	100	4	517.5	4.25	5	0	0	0	0	1
254	2	2	17	2	253	2	95.8333	97.2222	3.27841	95	95	3	550.5	4.25	5	0	0	0	0	1
254	2	2	20	3	271	2	94.4444	72.2222	3.2062	100	95	7	630	3.5	4.8	0	0	1	0	0
254	2	2	23	5	281	0	95.8333	100	2.1289	95	95	4	530.5	2.25	3.8	0	0	2	0	0
254	2	2	11	3	273	1	97.2222	97.2222	3.2062	95	95	2	471	4	5	0	0	0.25	0	0.5
254	2	2	14	3	267	0	95.8333	97.2222	3.12321	100	95	3	500.5	3.5	4.8	0	0	0.25	0	0.5
254	2	2	17	3	271	9	98.6111	88.8889	2.18137	100	85	3	525	4.25	4.8	0	0	0.25	0	0.5
254	2	2	20	3	293	6	98.6111	94.4444	3.54433	100	100	4	523	3.5	4.8	0	0	0.25	0	0
254	2	2	23	3	290	3	94.4444	58.3333	2.29346	100	100	6	530.5	3.25	4.6	0	0	1.25	0	0
255	1	1	2	2			93.0556	97.2222	2.53722	100	90	7	586	2.75	4.8	0	0	2	0	0
255	1	1	5	2			90.2778	69.4444	1.41455	90	95	4	556	2.75	5	0	0	1.5	0	0.5
255	1	1	8	4			80.5556	19.4444	1.82641	85	95	3	567.5	2.25	4.6	0	0	2.25	0	0.5
255	1	1	11	2			88.8889	44.4444	2.52142	90	90	1	471	2.25	5.4	0	0	2	0	0
255	1	1	14	5			88.8889	22.2222	1.9322	95	95	1	545	2.5	4.6	0	0	3	0	1
255	1	1	2	1			91.6667	86.1111	2.41125	100	90	3	525	3.75	5.4	0	0	0	0	0
255	1	1	5	2			79.1667	69.4444	1.31421	100	85	4	519	3.75	5	0	0.25	0.25	0	0
255	1	1	8	3			79.1667	36.1111	1.71819	85	90	1	498	2.25	4.4	0	1.25	1.5	0	1.5
255	1	1	11	4			91.6667	77.7778	2.28019	80	90	3	511.5	2.5	4.6	0	1.25	2	0	1.5
255	1	1	14	5			86.1111	47.2222	1.17257	85	95	4	554	0.5	5	0	0.25	3.25	0	0
255	2	1	11	1			93.0556	94.4444	2.24726	95	95	1	527	3	5	0	0	0	0	0
255	2	1	14	2			93.0556	63.8889	3.06847	85	90	1	510	1	5	0	0	0.5	0	0
255	2	1	17	3			94.4444	47.2222	2.85951	95	90	3	603.5	2.5	5.4	0	1	2.5	0	1
255	2	1	20	5			91.6667	44.4444	1.30094	70	70	7	641	0.75	5.6	0	0	3.5	0	0
255	2	1	23	6			56.9444	16.6667	0.157311	55	65	4	574.5	1	4.8	0	0	4.5	0	0
255	2	1	11	1			94.4444	86.1111	2.71262	100	90	2	471	3.5	5.2	0	0	0	0	0
255	2	1	14	2			93.0556	80.5556	2.31099	95	100	1	478	2.5	5.8	0	0	0.25	0	0
255	2	1	17	3			91.6667	38.8889	3.06847	95	65	8	591	2.25	5	0	0	1	0	0
255	2	1	20	4			83.3333	50	1.18314	95	90	5	580.5	0.75	5	0	0	1	0	0
255	2	1	23	6			66.6667	19.4444	0.399866	70	80	3	536	0.5	5	0	0	3.75	0.333333	0
256	1	2	2	2	234	0	97.2222	88.8889	4.78796	100	95	3	452.5	1	2.6	0	0.25	1.5	0	1
256	1	2	5	2	229.5	0	97.2222	80.5556	2.16239	100	100	8	457	2.25	2.6	0	0	1.5	0	1.5
256	1	2	8	2	222	0	97.2222	63.8889	2.14147	100	90	5	473.5	1.25	2.4	0	0	1.5	0	1.5
256	1	2	11	2	237.5	0	97.2222	91.6667	3.54433	100	90	0	452.5	1.5	3	0	0	1.5	0	1.5
256	1	2	14	2	240	2	98.6111	52.7778	2.03683	95	100	2	419	1.5	2.4	0	0	1.75	0	1.5
256	1	2	2	2	256	0	98.6111	86.1111	2.62963	90	95	6	450.5	1.25	2.2	0	0	1.5	0	1
256	1	2	5	2	268	1	98.6111	75	3.27841	95	90	1	401.5	1.5	2.2	0	0	0.75	0	1
256	1	2	8	2	259	0	98.6111	91.6667	3.46134	100	100	2	453	1.75	2.8	0	0	1.25	0	1
256	1	2	11	2	257.5	1	94.4444	55.5556	3.2062	100	80	2	420.5	1.5	3	0	0	1.5	0	1
256	1	2	14	2	263	1	98.6111	88.8889	4.78796	100	95	2	440	1.25	2.6	0	0	2	0	1.5
256	2	2	11	2	269	0	98.6111	97.2222	4.78796	95	100	0	423.5	1.75	3	0	0	1.25	0	1
256	2	2	14	2	269	3	98.6111	80.5556	1.73166	100	100	1	423.5	1.75	3	0	0	1.25	0	1
256	2	2	17	2	243	2	95.8333	47.2222	1.21338	90	95	1	427	1.75	3.2	0	0	2.25	0	1.5
256	2	2	20	2	245	2	98.6111	83.3333	2.31099	100	100	7	454	1.25	2.6	0	0	2.5	0	0
256	2	2	23	2	275.5	1	98.6111	36.1111	3.54433	100	100	5	450	1	3	0	0	2.5	0	0.5
256	2	2	11	2	267	2	95.8333	55.5556	2.03683	100	100	0	410.5	1.5	2.8	0	0	1.25	0	0.5
256	2	2	14	2	271	1	97.2222	47.2222	2.0503	100	95	0	424	1	2.8	0	0	1.5	0	1
256	2	2	17	2	271	1	97.2222	86.1111	2.85951	90	95	4	458	1	2.8	0	0	1.75	0	1
256	2	2	20	2	268	0	95.8333	69.4444	2.98548	100	95	8	476.5	1	3	0	0	2.25	0	1
256	2	2	23	2	265	1	93.0556	52.7778	3.27841	100	85	3	460.5	1	2.8	0	0	2	0	1.5
257	1	2	2	2	265.5	1	95.8333	83.3333	1.45441	95	95	4	487.5	3	4.2	0.5	0	1.25	0.666667	1
257	1	2	5	2	264	0	93.0556	80.5556	2.31099	100	100	2	459.5	3.75	4.4	0	0	1	0	0.5
257	1	2	8	2	263	0	91.6667	83.3333	1.72961	90	95	5	467.5	4	4.4	0	0	0.5	0.666667	1
257	1	2	11	3	265.5	0	91.6667	41.6667	1.62498	90	95	2	423	3.25	4.4	0.5	0	1.25	0.666667	1.5
257	1	2	14	4	289.5	1	97.2222	72.2222	1.63875	90	90	5	484	2.25	4	0.5	0	2	0.666667	0.5
257	1	2	2	1	254	0	90.2778	66.6667	1.86273	85	90	2	413	4.5	4.8	0.5	0	0.75	1	2
257	1	2	5	1	246	0	77.7778	63.8889	1.83541	85	95	3	438.5	4	5.4	0	0	0.5	0.333333	0.5
257	1	2	8	2	252.5	1	91.6667	72.2222	1.85276	95	90	4	452	4.25	5	0	0	0.75	0.666667	1.5
257	1	2	11	3	252	0	94.4444	77.7778	1.96737	100	100	2	422.5	3.25	4.2	1	0.25	0.75	0.666667	1.5
257	1	2	14	4	256.5	1	87.5	63.8889	2.07316	100	90	1	425	3	4	0.5	0.25	1	0.666667	2
257	2	2	11	2	270	1	93.0556	94.4444	1.34977	90	95	2	437.5	3.25	4	0	0	1.25	0.333333	1.5
257	2	2	14	2	257.5	0	75	83.3333	2.31099	90	95	4	452	3.5	4	0	0	1	0.666667	0.5
257	2	2	17	3	259	0	86.1111	75	2.24726	85	100	3	481.5	3	4	0	0	1.5	0.666667	1.5
257	2	2	20	5	272.5	0	94.4444	83.3333	1.52844	95	100	6	469	2.25	3.8	0	0	2.75	0	1
257	2	2	23	6	298	2	91.6667	75	1.8363	90	75	6	479	1.75	3.6	0	0.25	4.5	0	1
257	2	2	11	2	256.5	2	93.0556	94.4444	3.06847	95	100	3	460.5	3.5	4	0	0	0.75	0	1.5
257	2	2	14	2	264	0	91.6667	66.6667	0.844044	100	100	5	455.5	3.25	4.8	0	0	0.75	0	1.5
257	2	2	17	3	267	0	94.4444	77.7778	0.418359	95	90	3	447	2.75	4	0	0	1.5	0	1.5
257	2	2	20	5	287	2	94.4444	80.5556	1.8363	100	100	4	477	1.5	3.2	0.5	0.25	3.75	0	1
257	2	2	23	6	294	0	88.8889	44.4444	2.03683	90	90	2	458	2	3.4	0	0.5	4.5	0	0.5
258	1	1	2	1	237	0	95.8333	97.2222	2.9425	95	95	1	483	3	4	0	0	0	0	0
258	1	1	5	1	242	2	94.4444	86.1111	3.2062	95	95	2	529.5	3.25	4.6	0	0	0	0	0
258	1	1	8	1	262.5	0	94.4444	80.5556	3.27841	95	95	3	537	3	3.2	0	0	0	0	0
258	1	1	11	1	243	3	98.6111	75	3.2062	95	90	2	503.5	3	4	0	0.5	0.25	0	0
258	1	1	14	2	256.5	0	97.2222	88.8889	2.98548	90	100	4	537	3	4	0	0	0.25	0	0.5
258	1	1	2	1	261	3	95.8333	86.1111	4.04266	100	100	3	534	3	4	0	0	0	0	0
258	1	1	5	1	240	1	93.0556	77.7778	3.3614	100	90	3	589	3	4	0	0	0	0	0
258	1	1	8	3	230	1	93.0556	91.6667	3.2062	95	100	5	512.5	2.5	4	0	0	1	0	1
258	1	1	11	1	245	1	91.6667	97.2222	2.85951	90	100	5	562	3	4	1	0.5	0.25	0.333333	1.5
258	1	1	14	2	238	1	95.8333	91.6667	2.82471	90	95	4	524	3	4	0	0	0	0	0
258	2	1	11	2	259	1	94.4444	100	2.9425	100	100	3	530	3	4	0	0	0	0	0
258	2	1	14	2	254.5	1	98.6111	97.2222	3.54433	100	100	1	515	3	4	0	0	0	0	0
258	2	1	17	2	226	1	91.6667	86.1111	3.27841	95	95	4	566	2	4	0	0	0	0	0
258	2	1	20	3	246	3	95.8333	86.1111	2.07316	100	95	2	553	3	4	0	0	0	0	0
258	2	1	23	4	235	2	94.4444	91.6667	2.9425	100	90	6	620	1.75	4	0	0	1.5	0	1.5
258	2	1	11	1	242	1	95.8333	94.4444	3.06847	95	100	2	522	3	4	0	0	0	0	0
258	2	1	14	1	248	3	97.2222	88.8889	3.69399	100	95	4	522	3	4	0	0	0	0	0
258	2	1	17	2	232	2	91.6667	91.6667	3.06847	100	95	3	508	3	4	2	0	0.25	0	0.5
258	2	1	20	2	253	2	94.4444	88.8889	2.35547	100	90	3	522	3	4	0	0	0	0	0
258	2	1	23	3	243	0	94.4444	77.7778	2.53722	100	100	3	527	2.5	4	0	0	0.5	0	1
260	1	1	2	2	284.5	2	98.6111	72.2222	2.22558	85	85	4	466.5	3	4	0	0	1	1.66667	0.5
260	1	1	5	2	267	1	97.2222	72.2222	2.52142	90	85	5	510.5	3	3.4	0.5	1.25	0.75	0	1.5
260	1	1	8	2	278.5	0	94.4444	58.3333	3.2062	85	90	2	495	3	3.4	1	0.25	1.5	1	1
260	1	1	11	2	275	4	95.8333	69.4444	3.46134	90	80	2	467	2.75	3.4	0.5	0.25	3.25	0.333333	2
260	1	1	14	2	277	0	94.4444	88.8889	2.9425	90	95	4	514.5	3.25	3.4	0.5	0.25	3	1.33333	1.5
260	1	1	2	2	266	0	95.8333	75	2.9425	85	85	4	481	3	3.6	0	0	3.5	1	0.5
260	1	1	5	2	264	0	94.4444	50	2.9425	100	90	4	473.5	3.5	4	0.5	0.75	1.5	0.666667	0.5
260	1	1	8	2	271	0	98.6111	66.6667	2.71262	95	95	3	465	3.75	3.6	0.5	0.25	1.75	0	0.5
260	1	1	11	2	280	2	94.4444	58.3333	2.82471	100	95	1	464	3	3.4	0.5	0	1.75	0	0
260	1	1	14	2	271	0	95.8333	41.6667	2.98548	95	90	2	459	2.75	2.8	0.5	0	1.75	0.333333	1
260	2	1	11	2	255	2	95.8333	75	3.54433	100	85	3	465	3	3	0.5	0.5	3.5	0.333333	0
260	2	1	14	2	265	0	94.4444	75	2.9425	90	95	3	462.5	3.25	4.2	0.5	0	2.25	0.666667	0
260	2	1	17	3	300	3	97.2222	47.2222	2.98548	100	95	4	503.5	2.25	4	0	0	2.25	0	0.5
260	2	1	20	4	270	3	98.6111	55.5556	2.85951	100	90	6	549	1.5	2.6	0	0.5	3.75	0	1.5
260	2	1	23	6	286	6	98.6111	77.7778	2.24726	90	85	6	503	1.25	2.8	0.5	0	3.5	0	0.5
260	2	1	11	1	251	3	97.2222	77.7778	3.18718	90	100	2	476	1	2.2	0.5	0	4.75	0	2
260	2	1	14	3	272	1	97.2222	80.5556	3.2062	100	90	2	501	1.5	2.8	0	0.25	1	0.333333	1.5
260	2	1	17	3	272	0	98.6111	72.2222	1.86273	100	90	3	500	2	3.4	0	0	3	0	1.5
260	2	1	20	3	266	0	95.8333	80.5556	2.82471	100	95	2	530	1.5	3.8	0	0	3.25	0.333333	2
260	2	1	23	3	268.5	6	97.2222	69.4444	1.85276	85	85	13	548	1	3.4	0	0	3.25	0.333333	2
261	1	1	2	1	298	3	97.2222	100	4.12564	100	90	7	467.5	4.5	5.4	0	0	0	2	0
261	1	1	5	1	292	1	95.8333	83.3333	2.53722	95	95	3	430	3.75	5.6	0	0	0.5	1.33333	0
261	1	1	8	2	344	9	95.8333	88.8889	4.78796	100	100	5	464	4.25	5.8	0	0.25	0	2	0
261	1	1	11	2	392	8	95.8333	83.3333	3.77697	100	100	4	426	3.75	5.6	0	0	0.5	1.66667	0
261	1	1	14	3	330	4	97.2222	97.2222	2.98548	100	95	2	412	3.5	5.2	0	0	0.5	2.33333	0
261	1	1	2	2	298	3	97.2222	91.6667	2.41125	100	100	2	402	3.25	5	0	0	0.75	0	0
261	1	1	5	2	278.5	1	97.2222	94.4444	4.04266	100	75	3	404.5	3	4.4	0.5	0	0.5	1.33333	2.5
261	1	1	8	2	338.5	7	95.8333	100	3.27841	95	75	1	399	3.25	4.8	0	0	0.25	1	0
261	1	1	11	2	310	3	95.8333	80.5556	3.3614	95	90	1	380.5	3.75	5	0	0.25	0.25	0	0.5
261	1	1	14	2	312.5	2	98.6111	97.2222	3.54433	85	90	3	403	3.25	4.4	0	0.25	0	2	0.5
261	2	1	11	1	363	8	97.2222	100	4.78796	95	95	4	450.5	3.25	3.2	0	0	0	1.33333	0
261	2	1	14	1	326	4	98.6111	94.4444	4.12564	100	100	2	433	4.25	5.8	0	0	0	2	0
261	2	1	17	1	348	10	95.8333	94.4444	3.77697	100	85	4	461	4.5	5.8	0.5	0	0	2	0
261	2	1	20	3	440.5	22	97.2222	86.1111	3.46134	100	85	4	424	6	6	0	0	0.5	2	0
261	2	1	23	4	409	12	97.2222	86.1111	1.9925	90	75	7	458	1.25	3.2	0	0	1.5	0	0
261	2	1	11	1	328	4	97.2222	100	4.78796	100	85	4	431	2.75	2.8	0	0.5	3.25	1	1
261	2	1	14	1	399	14	98.6111	100	3.77697	100	90	7	446.5	4	5	0	0	0	1.66667	0
261	2	1	17	1	328	5	97.2222	100	3.3614	95	75	8	445.5	3.75	4.8	0	0	0	2	0
261	2	1	20	2	372	7	97.2222	94.4444	3.77697	95	95	7	471	2.5	4.2	0	0	0	1.33333	0.5
261	2	1	23	2	411	19	95.8333	50	0.389004	95	65	15	521	3.5	4.4	0	0	0.25	1.66667	0
262	1	1	2	2	278	0	97.2222	97.2222	4.78796	95	100	6	463	3	4	0	0	0	0	0
262	1	1	5	1	271.5	0	98.6111	100	3.77697	100	90	2	457	2.75	3.6	0	0	0	0	0
262	1	1	8	1	274	2	97.2222	100	4.78796	90	95	2	452	3	4	0	0	0	0	0
262	1	1	11	1	278	0	98.6111	88.8889	3.54433	90	100	2	418	3	4	0	0	0	0	0
262	1	1	14	1	296	1	98.6111	100	4.78796	90	90	2	455	3	4	0	0	0.5	1.33333	1
262	1	1	2	2	298	0	98.6111	97.2222	4.12564	100	95	4	446.5	3	4	0	0	0	0	0
262	1	1	5	2	294	4	95.8333	100	3.77697	100	100	6	449.5	2.25	2.4	0	0.5	0	0	0
262	1	1	8	1	312	2	97.2222	91.6667	3.77697	95	100	3	471	1.75	2.6	0	0	0	0	0
262	1	1	11	1	294	3	98.6111	94.4444	3.3614	90	100	4	426	3	3.6	0	0	0	0	0
262	1	1	14	1	291	0	98.6111	100	3.54433	90	95	1	417.5	3	4	0	0	0	0	0
262	2	1	11	1	299	1	95.8333	100	4.78796	100	95	1	417	2.25	3	0	0	0	0	0
262	2	1	14	1	293	1	97.2222	97.2222	3.77697	90	100	2	415	2.25	3	0	0	0	0	0
262	2	1	17	1	291	1	95.8333	75	4.12564	100	100	3	443	2.25	2.4	0	0	0	0	0
262	2	1	20	1	285.5	2	97.2222	86.1111	4.12564	90	95	4	439.5	2.25	2.8	0	0	0	0	0
262	2	1	23	1	319	1	95.8333	80.5556	3.77697	95	100	4	444	2.25	3	0	0	0	0	0
262	2	1	11	3	304.5	1	98.6111	100	4.78796	100	100	1	426	2.25	2.8	0	0	0	0	0
262	2	1	14	2	300	0	98.6111	94.4444	4.12564	100	95	3	437	1.5	1.6	0	0	0.5	0	0
262	2	1	17	2	314	4	95.8333	86.1111	4.12564	90	90	4	414	1.75	1.4	0	0	0	0	0
262	2	1	20	2	312.5	5	97.2222	97.2222	3.77697	100	95	3	416	1.75	1.8	0	0.5	0	0	0
262	2	1	23	7	323.5	3	98.6111	69.4444	3.54433	95	100	2	422	1.75	2	0	0	0	0	0
263	1	2	2	3	290	1	94.4444	91.6667	0.486986	100	95	7	450	2	4.2	0	0	3.5	0	0
263	1	2	5	1	295.5	1	94.4444	80.5556	0.712382	100	100	4	443	3	3.8	0	0	1	0	0
263	1	2	8	2	284	2	97.2222	69.4444	-0.124833	100	100	2	432	4.75	5.4	0	0	0	0	0
263	1	2	11	2	257	0	98.6111	77.7778	0.583672	100	100	5	423	3.75	5	0	0	0	0	0
263	1	2	14	2	271	2	94.4444	86.1111	0.131067	95	100	0	403	3.75	4.8	0	0	0	0	0
263	1	2	2	3	281	1	97.2222	86.1111	1.6365	100	95	4	418	3.5	4.8	0	0	0.75	0	0
263	1	2	5	2	295.5	2	90.2778	66.6667	0.566699	100	95	2	412	1.5	2	0	0	2	0.333333	0
263	1	2	8	2	290	4	95.8333	91.6667	0.232645	100	85	0	422	2.75	2.8	0	0	0	0	0
263	1	2	11	2	283	2	95.8333	80.5556	0.486986	100	100	5	430.5	1.5	2	0.5	0	0	0.666667	0
263	1	2	14	2	317	1	88.8889	75	-0.529156	100	95	1	411	1.75	2.4	0	0	0.5	0	0
263	2	2	11	1	274	0	95.8333	100	0.486986	100	85	2	397	2.25	3	0.5	0	0	1.66667	1.5
263	2	2	14	1	279	2	94.4444	83.3333	0.643521	100	95	3	407.5	4.75	6	0	0	0	0	0
263	2	2	17	2	296.5	2	94.4444	80.5556	0.304058	90	85	1	412	4.75	5.6	0	0	0	0	0
263	2	2	20	4	313	2	90.2778	66.6667	-0.47586	100	90	8	441	2.25	3.2	0	0	1.25	0	0
263	2	2	23	4	310	6	97.2222	80.5556	-1.12137	100	75	1	429.5	1.5	2.8	0.5	0.25	2.5	0.333333	0
263	2	2	11	2	296	3	93.0556	83.3333	-0.373004	100	90	4	404	1.75	3	0	0	3.25	0	0
263	2	2	14	2	283	1	94.4444	77.7778	-1.29283	95	100	3	414.5	2.25	3	1	0	0.75	0	0
263	2	2	17	2	292	6	95.8333	91.6667	-0.223812	90	90	4	412	2.25	3	1.5	0.75	1	1.33333	1
263	2	2	20	3	270	2	93.0556	86.1111	-0.0492039	95	85	7	438	1.75	3	0.5	0.5	1.25	0.666667	0.5
263	2	2	23	6	435	35	93.0556	66.6667	0.950491	90	90	16	523	2	3	0	0.75	1	0	0.5
265	1	1	2	1	329	3	98.6111	100	3.27841	80	100	0	502.5	3.75	5.4	0	0	0.5	0	0
265	1	1	5	3	336	4	98.6111	94.4444	2.84905	95	100	3	494	2.5	5	0	0	2.75	0	0
265	1	1	8	2	358	3	98.6111	80.5556	3.77697	100	95	4	560	2.75	4.6	0	0	1.75	0	0
265	1	1	11	1	337	2	98.6111	77.7778	3.77697	100	90	5	562	4	4.8	0	0	1	0	0
265	1	1	14	4	361	7	98.6111	88.8889	2.4372	100	95	7	621	2	3.2	0	0	3	0	0
265	1	1	2	1	345	4	98.6111	91.6667	3.2062	90	100	0	523.5	5.5	6	0	0	0	0	0
265	1	1	5	1	324	4	97.2222	75	3.46134	100	95	3	633.5	5.5	5.8	0	0	0	0	0
265	1	1	8	1	338	2	97.2222	88.8889	3.46134	100	95	6	653.5	5.75	5.8	0	0	0	0	0
265	1	1	11	2	332.5	3	98.6111	75	3.06847	100	90	3	567.5	4.25	5.2	0	0	1	0	0
265	1	1	14	6	356	2	98.6111	97.2222	3.01308	90	95	1	592.5	2.5	4.6	0	0	2.25	0	0
265	2	1	11	1	344	2	97.2222	100	3.77697	100	100	0	450	3.5	5	0	0	0	0	0
265	2	1	14	1	333	2	97.2222	80.5556	3.24573	100	100	2	508.5	4	4.6	0	0	0.25	0	0
265	2	1	17	2	344	4	98.6111	86.1111	4.12564	90	95	3	511	3.75	4.6	0	0	0.75	0	0
265	2	1	20	4	369.5	11	98.6111	63.8889	4.04266	100	100	5	565.5	0.75	2.6	0	0	2.5	0	0
265	2	1	23	6	468.5	39	95.8333	63.8889	2.1735	90	90	6	510.5	0	3.6	0	0	3.75	0	0
265	2	1	11	2	323.5	3	94.4444	91.6667	2.20636	100	100	5	570.5	2.5	4.2	0	0	2	0	0
265	2	1	14	3	324	2	98.6111	97.2222	3.54433	100	100	0	481	2	4.4	0	0	2	0	0
265	2	1	17	2	333	1	95.8333	86.1111	3.2062	95	80	0	504	3.5	4.6	0	0	0.75	0	0
265	2	1	20	4	361	9	93.0556	55.5556	2.54388	95	90	3	551.5	4	5.4	0	0	0.5	0	0
265	2	1	23	6	380	11	95.8333	63.8889	3.46134	95	90	4	573	5.25	5.8	0	0	0.75	0	0
266	1	1	2	2	315	11	90.2778	97.2222	2.67495	90	90	6	480	2	3.2	0	0	0.75	0.333333	0
266	1	1	5	1	287	7	90.2778	94.4444	3.27841	100	90	4	487	3.5	3	0	0	0	0	0
266	1	1	8	1	303	6	88.8889	80.5556	2.98548	95	95	1	448	3.5	4	0	0	0.25	0	1
266	1	1	11	1	298	3	90.2778	91.6667	2.46756	95	90	4	468	3.25	4.2	0	0	0	1	1
266	1	1	14	2	280	5	90.2778	94.4444	1.25816	90	85	2	449	1.25	2.6	0	0	3	0.333333	1.5
266	1	1	2	1	287	1	95.8333	94.4444	1.52115	90	90	3	439	5.25	4.8	0	0	0	0	0
266	1	1	5	1	309	5	90.2778	75	2.03683	90	90	2	465	4.5	4.8	0	0	0	0	0
266	1	1	8	1	324	12	93.0556	94.4444	2.69909	90	95	4	480	5	4.6	0	0	0	1.33333	0
266	1	1	11	1	333	6	93.0556	88.8889	2.74172	100	100	0	429	3	3	0	0	0.25	0	1
266	1	1	14	4	288	8	88.8889	88.8889	2.1735	90	85	4	451	1.75	2.2	0	0	2.5	0	0
266	2	1	11	2	277	2	90.2778	97.2222	2.98548	85	100	4	518	2	1.8	0	0	1.25	0	0
266	2	1	14	1	310	0	97.2222	86.1111	2.50154	100	100	3	441	2.25	3.2	0	0	0	0	0
266	2	1	17	2	339	11	93.0556	77.7778	2.31099	100	85	5	431	1.5	2.6	1	1.25	1.75	0	1
266	2	1	20	3	326	6	86.1111	50	3.77697	100	95	6	436.5	2	2.4	0.5	1.25	2.75	0.333333	0
266	2	1	23	7	364	25	84.7222	77.7778	3.77697	100	90	6	500	0	1.8	1.5	1.75	4.75	0.333333	3
266	2	1	11	2	306	2	94.4444	91.6667	2.60441	95	100	3	439	2.5	3	0	0	0.25	0	0
266	2	1	14	1	288	2	94.4444	77.7778	3.06847	75	100	4	428.5	1.75	2.8	0	0	0.75	0	0.5
266	2	1	17	2	291	4	90.2778	97.2222	0.771781	95	90	2	472.5	1.25	1.8	1.5	0	1	0	1.5
266	2	1	20	4	305.5	1	91.6667	94.4444	0.771781	90	100	4	485	1	2.2	0	0	2	0.333333	1
266	2	1	23	7	375.5	20	95.8333	75	1.63324	100	60	11	496.5	0.5	0.6	2.5	2.5	3	-0.333333	1.5
267	1	2	2	3	362	2	95.8333	97.2222	3.77697	100	90	1	590.5	2	1.8	1	1.25	1.75	1	1
267	1	2	5	1	368.5	4	98.6111	100	3.77697	100	100	2	673.5	4.25	3.2	0.5	0.75	0	1.33333	2.5
267	1	2	8	2	394.5	12	87.5	83.3333	2.49861	75	85	2	615.5	2.75	1.4	1	1	1	1.66667	1
267	1	2	11	2	468.5	38	93.0556	88.8889	4.04266	85	95	1	571	1.25	2.6	2	1.5	2.5	2	2
267	1	2	14	3	397	15	95.8333	94.4444	3.3614	95	80	8	772	3.25	2	2.5	2.75	2.5	3	1.5
267	1	2	2	3	399.5	26	97.2222	100	3.3614	100	100	0	680.5	2.5	3.6	1	2.75	2.5	2.66667	2
267	1	2	5	1	475	34	94.4444	94.4444	3.54433	100	100	2	617	3.5	2.6	0	1	0	1	3
267	1	2	8	1	392.5	19	90.2778	88.8889	2.98548	90	80	8	745.5	3.5	2.6	0	3	0	0.333333	0.5
267	1	2	11	3	464	40	94.4444	97.2222	3.2062	95	100	3	623.5	1.5	2	1	1.5	1.25	1	0.5
267	1	2	14	4	533.5	54	97.2222	97.2222	2.82471	100	90	3	648.5	2	0.6	2	3.25	2.75	1	2
267	2	2	11	1	420.5	21	97.2222	100	3.54433	90	95	2	585	3.25	1.6	1	1	0.75	2	3
267	2	2	14	1	413	18	97.2222	94.4444	3.54433	100	100	0	548.5	5	2	0	1.5	0.25	2.66667	3.5
267	2	2	17	3	439	28	94.4444	86.1111	4.12564	95	100	2	597	2.75	1.6	1.5	1.75	1.75	2.33333	2.5
267	2	2	20	1	491.5	43	95.8333	97.2222	2.9425	95	90	7	715	3.25	1.6	0.5	1.75	0.75	2.66667	3
267	2	2	23	6	484	37	93.0556	83.3333	2.0375	80	75	7	735	0	0.2	3	4	3.5	1.33333	2
267	2	2	11	2	443	26	98.6111	88.8889	3.54433	100	95	8	668	4.5	1	1	2.25	0.5	3	4
267	2	2	14	1	417.5	23	97.2222	94.4444	4.12564	100	100	5	588.5	4.5	1.2	0.5	1.75	0.75	3	4.5
267	2	2	17	4	458	37	97.2222	97.2222	3.54433	95	95	3	665	1.25	0.4	3	2	4.25	2	3.5
267	2	2	20	4	404.5	14	94.4444	83.3333	3.77697	95	90	1	571	2	1.4	4	3.25	4	3.33333	3.5
267	2	2	23	6	416	20	94.4444	80.5556	1.85276	80	75	1	615	0.75	0.6	4	3.25	5	2.33333	2
269	1	1	2	1	331	0	97.2222	94.4444	2.28019	100	100	1	529	6	6	0	0	0	0	0
269	1	1	5	1	303	1	98.6111	86.1111	3.12321	100	100	2	504	6	6	0	0	0	0	0
269	1	1	8	1	293	0	98.6111	66.6667	1.96485	100	95	1	496	6	6	0	0	0	0	0
269	1	1	11	1	308	3	97.2222	69.4444	3.06847	100	85	1	503	6	6	0	0	0	0	0
269	1	1	14	1	324	11	98.6111	66.6667	2.24726	100	95	2	490	6	6	0	0	0	0	0
269	1	1	2	1	314	3	98.6111	77.7778	1.66484	100	95	3	503.5	6	4.8	0	0	0	0	0
269	1	1	5	1	292	2	98.6111	72.2222	2.35547	90	95	5	533	6	6	0	0	0	0	0
269	1	1	8	1	295	8	97.2222	63.8889	1.10115	95	95	4	572	6	6	0	0	0	0	0
269	1	1	11	1	307.5	11	98.6111	69.4444	0.952022	100	85	11	636	6	6	0	0	0	0	0
269	1	1	14	1	338	5	97.2222	86.1111	2.34634	100	85	1	486.5	6	6	0	0	0	0	0
269	2	1	11	1	309	2	95.8333	97.2222	2.29947	100	95	3	544.5	6	6	0	0	0	0	0
269	2	1	14	1	310	2	98.6111	83.3333	2.20861	100	90	4	546.5	6	4.8	0	0	0	0	0
269	2	1	17	2	335	8	98.6111	66.6667	2.74172	100	90	2	565.5	4.75	6	0	0	1	0	0
269	2	1	20	1	292	2	98.6111	80.5556	2.53722	100	95	1	532	5.25	5.6	0	0	1	0	0
269	2	1	23	2	317	8	98.6111	55.5556	2.03683	90	90	2	472	4.25	5	0	0	2.25	0	0
269	2	1	11	1	322.5	4	98.6111	83.3333	3.3614	100	80	1	519.5	6	6	0	0	0	0	0
269	2	1	14	1	277	4	98.6111	83.3333	2.31099	100	100	1	516	6	6	0	0	0	0	0
269	2	1	17	1	307	6	98.6111	80.5556	1.72961	100	95	1	495	6	6	0	0	0	0	0
269	2	1	20	1	314	7	98.6111	75	1.62498	100	100	4	535	6	5.8	0	0	0	0	0
269	2	1	23	1	306	6	98.6111	75	2.71262	100	100	6	551	6	6	0	0	0	0	0
270	1	2	2	2	334	10	98.6111	94.4444	2.28935	90	95	0	500	2.75	3.6	0	0.75	0.75	1	1.5
270	1	2	5	2	316	2	95.8333	88.8889	2.14147	85	65	1	503	2	2.8	0	0	1.75	0	0
270	1	2	8	4	299	5	94.4444	77.7778	2.58536	95	75	6	564	0.5	2.4	0	0	3	1	0
270	1	2	11	3	325	7	94.4444	77.7778	2.46756	95	65	0	528.5	0.75	2.6	0	0	2.75	1.33333	0
270	1	2	14	4	366.5	6	93.0556	86.1111	2.41125	95	95	4	510	1	2.4	0	0	2.75	0.333333	0.5
270	1	2	2	2	373	17	94.4444	83.3333	2.14147	85	75	4	593	1	2.6	0	0	1.25	0.333333	0
270	1	2	5	3	357	8	88.8889	75	1.62703	95	70	4	619	0.75	2.6	0	0	2	0.333333	0
270	1	2	8	3	345.5	8	95.8333	80.5556	2.58536	85	75	6	589	1	2.8	0	0	2.5	0.333333	0
270	1	2	11	5	332	9	93.0556	66.6667	0.905885	95	70	3	553	0.5	2	0	0	3	0.333333	0
270	1	2	14	4	309.5	7	93.0556	94.4444	2.84905	85	90	3	625	0.75	2.2	0	0	2.25	0.333333	0
270	2	2	11	2	287.5	2	95.8333	97.2222	2.9425	95	85	5	557	0.5	2	0	0	1.5	0.333333	0
270	2	2	14	2	292	3	95.8333	94.4444	3.69399	100	80	4	512	1	2.4	0	0	0.25	0.333333	0
270	2	2	17	2	369	16	98.6111	88.8889	2.71262	95	70	12	714	0.75	2.2	0	0.75	1.25	0.333333	0
270	2	2	20	3	320	8	97.2222	86.1111	2.41562	100	80	3	576.5	0.5	2.4	0	0	2.25	0.333333	0
270	2	2	23	6	321	12	86.1111	69.4444	0.939522	85	65	2	536	0.5	1.8	0	0	3	0.666667	1
270	2	2	11	2	323	6	98.6111	97.2222	3.77697	100	90	6	598	0.75	2.6	0	0	1	0.666667	0
270	2	2	14	2	331	8	97.2222	86.1111	2.74172	90	85	6	586.5	0.75	2.6	0	0	0.75	0.333333	0
270	2	2	17	2	421	30	95.8333	97.2222	2.71132	80	90	4	615.5	0.5	2.2	0	0	0.75	0.333333	0
270	2	2	20	2	375	15	93.0556	75	3.06847	90	85	10	714.5	0.75	2.6	0	0	1.75	0	0
270	2	2	23	4	358.5	13	98.6111	77.7778	1.06435	95	85	9	594	0.5	1.8	0	0	2.5	0.666667	0
271	1	1	2	1	331	7	98.6111	97.2222	4.12564	95	85	2	514.5	5	5.2	0	0	0	0	1
271	1	1	5	1	354	8	98.6111	100	4.78796	100	90	3	515.5	5.5	5.4	0	0	0	0	0.5
271	1	1	8	1	361	10	98.6111	100	4.12564	100	85	5	528.5	4.75	5	0	0	0	0	0.5
271	1	1	11	2	335.5	3	97.2222	97.2222	2.9425	100	100	4	499.5	4.25	5	0	0.25	0	0	0.5
271	1	1	14	2	349	13	94.4444	100	3.2062	100	90	3	524	3.25	5	0	0	1.25	0	0
271	1	1	2	1	325	5	97.2222	94.4444	4.12564	100	100	5	473	4.75	5.4	0	1.5	0	0	1.5
271	1	1	5	1	362.5	13	97.2222	100	4.78796	95	75	2	467	4.5	5.2	0	0	0	0	0.5
271	1	1	8	2	345	12	98.6111	94.4444	3.2062	100	95	3	477	4	5.2	0	0	0.5	0	0.5
271	1	1	11	1	306	0	97.2222	94.4444	2.9425	100	100	1	472	4.5	5.2	0	0	0.25	0	0.5
271	1	1	14	3	358	12	98.6111	100	3.77697	90	85	3	465	3.25	4.6	0	0.25	1.5	0	0
271	2	1	11	1	323	5	98.6111	100	4.12564	95	100	4	545	4.25	4.8	0	0	0.25	0	0.5
271	2	1	14	1	292.5	2	95.8333	94.4444	4.12564	100	100	4	509.5	5.25	5.4	0	0	0	0	0
271	2	1	17	2	312	7	97.2222	94.4444	4.78796	100	90	4	491.5	3.25	4.6	0	0	1.5	0	0
271	2	1	20	2	319	4	98.6111	94.4444	3.06847	100	100	7	527	3.25	5	0	1.25	2.25	0	1.5
271	2	1	23	2	363	14	91.6667	77.7778	2.83015	100	85	9	566	0.5	4.4	0	0	4	0	0
271	2	1	11	7	308.5	4	97.2222	100	3.77697	100	100	5	484	5	5.4	0	0	0	0	0
271	2	1	14	1	306	2	95.8333	97.2222	3.54433	95	100	3	466	4.5	5.4	0	0	0	0	0
271	2	1	17	1	289	2	91.6667	97.2222	2.46756	100	100	0	430	4.25	4.8	0	0	1.5	0	0
271	2	1	20	2	280.5	1	95.8333	94.4444	2.46756	95	95	1	420	3	5.4	0	0	1.5	0	0
271	2	1	23	3	275.5	3	95.8333	86.1111	1.94209	95	95	7	505	2.75	5.2	0	0	3	0	0
272	1	2	2	3	297.5	5	98.6111	97.2222	2.5924	90	100	5	465	2.5	4.8	0	0	1	0	0
272	1	2	5	4	290	0	95.8333	86.1111	2.18137	90	100	5	471	2	4.8	0	0	0.75	0	0
272	1	2	8	3	296	0	91.6667	94.4444	2.83015	95	90	2	477	2	5	0	0	0.75	0	0
272	1	2	11	3	298	1	97.2222	86.1111	2.54388	95	95	4	439	2.75	5	0	0	0.75	0	0
272	1	2	14	3	300	1	95.8333	94.4444	2.58536	95	100	7	515	2.25	4.8	0	0	0.75	0	0
272	1	2	2	2	290	2	97.2222	94.4444	3.2062	100	95	1	443.5	3.75	5	0	0	0.25	0	0
272	1	2	5	3	292.5	1	95.8333	91.6667	2.9425	100	95	2	440.5	3.5	5	0	0	0.25	0	0
272	1	2	8	3	289	1	91.6667	88.8889	2.98548	85	95	4	442	3.75	5	0	0	0.25	0	0
272	1	2	11	3	311	2	95.8333	86.1111	3.27841	100	100	2	426.5	3.75	5	0	0	0.25	0	0
272	1	2	14	2	312.5	5	98.6111	97.2222	3.46134	95	100	1	449.5	3.75	5	0	0	0.5	0	0.5
272	2	2	11	4	305	5	94.4444	100	3.5944	100	90	2	443	2.75	5	0	0	0.75	0	0
272	2	2	14	3	308	11	94.4444	94.4444	3.00426	95	95	2	428	3	5	0	0	0.5	0	0
272	2	2	17	3	330	6	94.4444	100	2.98548	100	100	2	449.5	3.5	5	0	0	0.5	0	0
272	2	2	20	5	349	8	94.4444	100	1.86273	100	95	8	508	1.5	4	0	0	2	0	0
272	2	2	23	6	398	10	93.0556	86.1111	1.62703	95	90	15	554	1	3.6	0	0.25	2.25	0	0
272	2	2	11	3	302.5	2	97.2222	100	3.69399	100	100	1	447	3.5	5	0	0	0.25	0	0
272	2	2	14	3	298	0	94.4444	100	3.3614	95	95	0	422	3.75	4.8	0	0	0.5	0	0.5
272	2	2	17	3	321	0	97.2222	100	2.49861	95	100	2	453.5	3	5	0	0	0.25	0	0.5
272	2	2	20	4	333.5	3	93.0556	88.8889	2.52142	100	95	7	491	2.25	3.8	0	0.5	0.75	0	0
272	2	2	23	6	361	13	95.8333	66.6667	1.64967	95	65	18	599.5	1	3.4	0	0.25	2	0	0
273	1	2	2	2	251	1	90.2778	94.4444	3.54433	95	90	0	491	2.25	3	0	0	1.25	0	0
273	1	2	5	2	245	3	86.1111	97.2222	2.98548	95	95	7	491	1	2.2	0.5	0	2.5	0	0
273	1	2	8	3	292	3	86.1111	97.2222	3.2062	100	85	5	519	1.75	3	0.5	0	2.5	0.333333	0
273	1	2	11	5	260.5	2	84.7222	80.5556	3.54433	90	95	4	486	0.75	2.8	1	0.25	3.25	0	0
273	1	2	14	6	264.5	1	95.8333	86.1111	3.2062	90	95	4	531.5	0.25	2.8	0.5	0	3.75	0	0
273	1	2	2	4	239	0	94.4444	94.4444	3.06847	85	100	2	469	1.5	3	0.5	0	2	0	0
273	1	2	5	2	294	6	95.8333	100	3.06847	95	100	4	498	1.75	2.4	0	0.25	2	0	0
273	1	2	8	4	266	1	84.7222	97.2222	4.78796	100	95	2	495.5	1.5	3	0	0	2.5	0	0
273	1	2	11	5	276	0	87.5	86.1111	2.82471	85	95	2	487.5	1	0.2	0.5	0.25	2.75	0	0
273	1	2	14	6	317	9	86.1111	94.4444	2.24726	85	85	1	481	0.25	0.4	1.5	1.75	3.25	1	1.5
273	2	2	11	4	322	5	90.2778	94.4444	3.77697	90	100	0	464.5	0.75	0.8	1.5	2.5	2	1	2
273	2	2	14	4	310	3	88.8889	91.6667	3.3614	60	85	0	473.5	0.75	1	1.5	2.75	2.25	1	1.5
273	2	2	17	5	309	3	93.0556	80.5556	3.06847	90	90	3	520	0.75	1	1.5	2.25	2.25	0.333333	1.5
273	2	2	20	5	328	2	95.8333	88.8889	2.41562	90	90	9	578	0.5	1	1.5	2.25	2.5	0.666667	1.5
273	2	2	23	7	323	9	86.1111	80.5556	2.20636	85	80	4	509.5	0.25	1	1.5	2.25	4.5	1	1.5
273	2	2	11	4	329	1	91.6667	100	3.54433	100	100	1	457	1.25	3	0.5	0.25	1.75	0.333333	0.5
273	2	2	14	4	313	2	94.4444	91.6667	4.78796	95	100	7	504.5	0.75	1.2	1	1.75	2.5	0.333333	0.5
273	2	2	17	5	329	4	88.8889	80.5556	2.9425	90	90	6	546	0.75	1.4	1.5	1.5	2.25	0.666667	0.5
273	2	2	20	6	340.5	3	87.5	88.8889	4.78796	75	80	11	564	0.5	1.2	1.5	2	2.75	1	1.5
273	2	2	23	7	369	9	93.0556	58.3333	2.74172	95	75	4	502.5	0.25	1	1.5	1	3.5	0	1.5
274	1	2	2	2	335	2	97.2222	91.6667	3.54433	95	95	6	602	2.5	3	0	0	1.25	0.333333	0
274	1	2	5	3	327	4	97.2222	75	3.3614	100	85	5	569.5	2.5	3.4	0	0	1	0.666667	0.5
274	1	2	8	4	324	3	98.6111	80.5556	3.18718	100	100	5	607.5	1.75	2.4	0	0	1.25	0	0
274	1	2	11	2	327	2	95.8333	86.1111	3.54433	95	95	3	578	3	3.2	0	0	1	0	0.5
274	1	2	14	4	325	4	97.2222	77.7778	4.04266	95	100	2	569	1.75	3	0	0	1.5	0	0.5
274	1	2	2	2	332	1	94.4444	80.5556	2.85951	100	95	2	506.5	2.5	3	0	0	0	0	0
274	1	2	5	3	335	5	97.2222	100	2.74172	90	95	2	565.5	1.75	2.8	0	0	1	0	0.5
274	1	2	8	4	327	3	97.2222	83.3333	3.69399	90	100	3	498	1.25	2.4	0	0	1.25	0	0
274	1	2	11	4	336.5	2	98.6111	77.7778	2.71262	100	100	4	542.5	1.75	2.8	0	0	1.25	0	0.5
274	1	2	14	5	320.5	2	98.6111	83.3333	3.27841	100	100	0	569.5	1	2	0	0	1.75	0	0
274	2	2	11	2	334	3	95.8333	97.2222	2.71132	100	100	1	514.5	2.75	2.8	0	0	0.25	0	0
274	2	2	14	3	338	3	98.6111	75	3.77697	95	100	6	540	1.5	2.6	0.5	0	1	0.333333	0
274	2	2	17	2	335	5	97.2222	83.3333	3.12321	100	100	5	551.5	2.5	2.4	0	0	0.5	0	0
274	2	2	20	4	340	3	98.6111	83.3333	2.85951	95	90	5	565	1.25	2.8	0	0	1.75	0	0
274	2	2	23	4	332	3	94.4444	80.5556	2.28019	95	100	2	543.5	1.25	2	0	0.25	1.25	0	0.5
274	2	2	11	2	307	1	93.0556	91.6667	2.9425	100	100	3	524	2.75	2.8	0	0	0	0	0
274	2	2	14	2	313	2	98.6111	97.2222	2.41125	100	100	1	533	2.5	3.2	0	0	1	0.333333	0.5
274	2	2	17	4	321	3	97.2222	72.2222	3.2062	100	100	0	542	2	2.8	0	0	1.25	0	0.5
274	2	2	20	4	320	5	97.2222	77.7778	3.3614	100	95	1	513	1.25	2.4	0	0	1.5	0	0
274	2	2	23	4	348	2	98.6111	80.5556	2.46756	100	100	1	531	1	2	0	0	1.75	0	0.5
276	1	1	2	1	295.5	2	98.6111	100	3.12321	100	100	5	576	4.75	4.8	0	0	0	0	0
276	1	1	5	1	278	1	98.6111	100	3.06847	100	100	7	610.5	4.75	3.8	0	0	0	0	0
276	1	1	8	3	309	4	98.6111	94.4444	3.06847	100	90	5	527	2.5	3	0	0	1.5	0	0.5
276	1	1	11	2	310	2	98.6111	94.4444	2.52142	100	100	2	513	2.75	2.6	0	0	1	0.333333	0.5
276	1	1	14	4	311	4	98.6111	97.2222	2.98548	100	100	5	545	1	2.8	0	0.25	3	0.333333	2
276	1	1	2	1	273.5	1	98.6111	100	3.3614	95	95	1	471.5	4.25	3.2	0	0	0.25	0.333333	0
276	1	1	5	2	234	1	98.6111	94.4444	2.14147	100	100	0	476	2.75	3.6	0	0	1.5	0.333333	1
276	1	1	8	1	283	4	98.6111	97.2222	2.9425	100	100	3	543	3.25	3.8	0	0	0.25	0.333333	0
276	1	1	11	4	298	7	98.6111	94.4444	3.12321	100	100	1	505	1.25	2.6	0	0	3	0.333333	1.5
276	1	1	14	6	297.5	3	98.6111	86.1111	3.00426	95	95	2	504.5	0.5	2.4	0	0	4	0	2
276	2	1	11	1	247.5	0	98.6111	100	3.77697	100	95	1	515.5	4	3.6	0	0	0.75	0	0
276	2	1	14	3	261.5	0	98.6111	100	3.54433	100	95	0	477.5	2	2.6	0	0	3	0	0
276	2	1	17	4	265	0	97.2222	100	4.12564	95	100	0	489.5	0.5	2.4	0	0	3.5	0	2
276	2	1	20	5	293	3	97.2222	100	2.71262	100	100	2	503	0.75	1.8	0	0	3.75	0	0
276	2	1	23	6	323	6	98.6111	100	2.71132	100	95	3	487	0.5	2.2	0	0	4.25	0	0
276	2	1	11	6	308	6	97.2222	91.6667	2.62963	100	100	3	521.5	0.5	1.4	0	1.5	3.75	0	1.5
276	2	1	14	2	266.5	1	98.6111	100	2.35547	100	100	0	504.5	2.25	2.4	0	0	2.25	0	0
276	2	1	17	3	284	3	98.6111	100	2.52142	100	100	1	507	1.75	2	0	0	1.5	0	0
276	2	1	20	2	306	4	98.6111	94.4444	2.29346	100	100	1	483.5	2.25	2.8	0	0	2	0	0
276	2	1	23	7	365	14	98.6111	72.2222	1.66484	100	95	1	516	0.5	0.8	0	1.5	4.5	0	0.5
277	1	2	2	5	460	31	97.2222	52.7778	3.06847	100	65	4	723.5	0	1.4	0	0.5	3.5	0	2
277	1	2	5	4	459	26	97.2222	41.6667	3.2062	100	90	5	773	0.25	0.2	0	0.75	1.5	0	2
277	1	2	8	2	485.5	42	97.2222	50	2.98548	100	75	4	651	0.75	0.6	0	3.5	0.75	0	3
277	1	2	11	6	466	32	94.4444	47.2222	2.41562	100	85	1	624.5	0	0	0	2	1.25	0	2
277	1	2	14	4	504	51	95.8333	47.2222	3.06847	95	65	4	727	0	0	0.5	4	1	0	3
277	1	2	2	2	508	50	98.6111	44.4444	3.12321	100	95	0	626	0.5	0	0	1.25	1	0	1.5
277	1	2	5	3	473	40	94.4444	44.4444	2.28935	100	60	3	688.5	0.75	0	0	1.75	1	0	1
277	1	2	8	3	475	36	93.0556	50	1.24398	70	60	8	771	0.75	0	0	1.75	0.25	0.666667	1.5
277	1	2	11	3	444	24	95.8333	61.1111	2.18137	100	75	1	604	0	0.2	0	0.5	0.5	0	1
277	1	2	14	6	493	40	98.6111	36.1111	1.96737	100	50	1	612.5	0.25	0	0	0.75	1.75	0	1.5
277	2	2	11	3	491	45	95.8333	27.7778	3.46134	100	80	2	610.5	0	0	0	1.5	1	0	1.5
277	2	2	14	3	451.5	30	97.2222	47.2222	4.78796	100	85	2	588.5	0	0	0	0.5	0.25	0	0.5
277	2	2	17	7	469	33	97.2222	41.6667	3.27841	100	55	4	656	0	0	0	1.5	4	0	2
277	2	2	20	7	512	48	94.4444	36.1111	0.276916	100	65	3	726	0	0	0	0.75	4.25	0	2
277	2	2	23	7	505	45	97.2222	30.5556	1.22042	100	55	4	723	0	0	0	0	4.5	1	1.5
277	2	2	11	2	434	25	98.6111	27.7778	3.06847	100	80	1	616	0	0	0	0	0.25	0	0
277	2	2	14	2	440.5	18	97.2222	55.5556	2.85951	100	90	3	612	1.5	0.6	0	0	0	0	0
277	2	2	17	3	462	34	98.6111	52.7778	2.82471	95	65	1	637	0.5	0	0	0.75	0	0	0.5
277	2	2	20	6	471	35	98.6111	19.4444	2.82471	100	50	3	643	0	0	0	1.25	2.25	0	1.5
277	2	2	23	7	559	59	95.8333	25	-0.0522452	40	55	7	802	0	0	0	1.75	3.75	0	3
278	1	2	2	2	362	7	98.6111	91.6667	3.77697	95	95	3	515.5	2.5	4.2	0	0	1.5	0	1.5
278	1	2	5	2	351	9	98.6111	94.4444	4.12564	90	100	1	484.5	2.25	4.2	0	0	1.5	0	1.5
278	1	2	8	2	359	7	98.6111	88.8889	3.77697	90	100	4	579.5	2.5	4	0	0	1.25	0.666667	1
278	1	2	11	2	414	20	98.6111	97.2222	3.54433	100	95	5	551	2.25	4.2	0	0.5	1.25	0.333333	1
278	1	2	14	3	363.5	11	98.6111	88.8889	3.77697	100	95	2	557.5	1.75	3.6	0	0.5	1.5	0	1
278	1	2	2	2	415.5	18	98.6111	100	3.77697	90	85	6	570	2.25	4	0	0.25	1	0.333333	0.5
278	1	2	5	2	398.5	17	97.2222	97.2222	3.27841	100	95	4	545	2.75	4.4	0	0.25	0.75	0.666667	0.5
278	1	2	8	2	373	17	97.2222	94.4444	3.54433	90	100	2	520	2	4.4	0.5	0	1.25	0	1.5
278	1	2	11	2	353	8	94.4444	88.8889	3.77697	95	100	2	490	2.25	4.2	0	0	1.5	1.33333	2
278	1	2	14	2	411.5	23	97.2222	97.2222	3.77697	90	90	2	509.5	2	4.2	0	0.5	2	0	3
278	2	2	11	2	446	33	98.6111	100	4.12564	95	100	1	492	2.25	4.4	0.5	0.25	0.75	0.333333	0.5
278	2	2	14	2	448	30	95.8333	94.4444	3.69399	85	95	1	511	2.75	4.4	0	0.75	1	0	1
278	2	2	17	3	482.5	42	98.6111	91.6667	4.78796	100	90	5	554.5	2	4	0	1	2.25	0	1
278	2	2	20	2	439	22	98.6111	86.1111	3.27841	95	85	0	510	1.75	3.8	0.5	0.5	2.5	0	1.5
278	2	2	23	4	463	35	97.2222	91.6667	3.77697	95	100	3	506.5	1.5	3.8	0.5	0.25	2.5	0	0.5
278	2	2	11	2	422	17	97.2222	86.1111	3.06847	100	95	0	513	2.5	3.8	0	0.25	0.25	0	1
278	2	2	14	2	413	17	98.6111	83.3333	3.06847	95	95	3	520.5	2	3	0	0.5	0.25	0	1
278	2	2	17	2	421	17	95.8333	97.2222	3.00426	90	100	5	586.5	1.75	3.6	0	0	0.25	0	0.5
278	2	2	20	3	462	32	97.2222	97.2222	4.78796	100	100	4	542.5	2	3.6	0	0.25	2	0.333333	1
278	2	2	23	3	388	11	94.4444	88.8889	2.9425	95	95	2	546.5	1.5	3	0	0.5	2.5	0	0.5
279	1	1	2	1	347	7	95.8333	91.6667	2.1735	80	95	5	507	4.5	6	0	0	0.75	1	0
279	1	1	5	1	343	14	90.2778	86.1111	3.54433	100	95	3	497.5	4.75	6	0	0	0	0	0
279	1	1	8	1	405	15	94.4444	77.7778	2.84905	90	95	0	499	4.5	6	0	0	0	0	0
279	1	1	11	1	377	16	93.0556	77.7778	2.5924	95	90	5	513.5	4.5	6	0	0	0	0	0
279	1	1	14	1	441.5	32	94.4444	83.3333	3.3614	90	100	11	584.5	4.5	6	0	0	0	0	0
279	1	1	2	1	418	28	95.8333	97.2222	3.46134	100	100	1	529.5	4.5	6	0	0	0	0	0
279	1	1	5	1	405	20	97.2222	97.2222	3.3614	95	100	4	495.5	4.5	6	0	0	0	0	0
279	1	1	8	1	332	10	97.2222	97.2222	3.12321	95	100	0	447	4.5	6	0	0	0	0	0
279	1	1	11	2	366	17	94.4444	80.5556	3.06847	95	100	1	466.5	4	5.8	0	0	0.25	0	0
279	1	1	14	2	353	10	97.2222	75	3.41983	95	100	1	469	4	6	0	0	0.25	0	0
279	2	1	11	1	324	7	97.2222	100	3.77697	100	100	1	457	4.5	6	0	0	0	0	0
279	2	1	14	1	333	9	97.2222	100	4.78796	90	100	2	444	4.5	6	0	0	0	0	0
279	2	1	17	1	343	5	93.0556	80.5556	2.46836	95	100	4	543	4.5	6	0	0	0	0	0
279	2	1	20	4	374.5	19	97.2222	55.5556	2.03683	100	100	10	658	1.75	4.6	0	1	3	0	1.5
279	2	1	23	6	363	11	90.2778	47.2222	2.11777	95	95	6	534	2	4.8	0	2.5	2.25	0.333333	4
279	2	1	11	1	360	14	94.4444	100	3.00797	95	100	2	497	4.5	6	0	0	0	0	0
279	2	1	14	1	369	9	97.2222	66.6667	2.84905	100	100	7	524	4.5	6	0	0	0	0	0
279	2	1	17	1	407	14	98.6111	100	3.00426	100	100	0	469	4.5	4.8	0	0	0.25	0	0
279	2	1	20	2	332	12	95.8333	97.2222	2.58536	100	100	8	612	4.5	6	0	0	0	0	0
279	2	1	23	2	420	14	97.2222	86.1111	2.9425	95	90	2	494.5	4.25	6	0	0	0.75	2	0
281	1	2	2	1	394	15	97.2222	69.4444	2.82471	100	95	1	464	5.5	5.2	0	0.5	0	0	0.5
281	1	2	5	1	360	6	90.2778	72.2222	4.78796	95	100	3	471	5.5	5	0	0.75	0	0	0.5
281	1	2	8	1	389	18	98.6111	63.8889	2.39398	100	95	1	486.5	5.5	5.4	0	0.75	0	0	0.5
281	1	2	11	1	428	19	98.6111	69.4444	3.12321	100	90	3	487.5	5	5	0	0.5	0	0	0.5
281	1	2	14	4	432.5	34	91.6667	58.3333	2.31099	80	80	2	484	4.25	5	0	0.5	0.75	0	0.5
281	1	2	2	1	434.5	25	91.6667	50	2.60441	85	90	8	551.5	6	5.2	0	0.75	0	0	0.5
281	1	2	5	1	347.5	5	93.0556	75	2.46756	90	85	2	502	5.5	5	0	1	0	0	1
281	1	2	8	1	410	21	95.8333	100	2.39398	100	90	9	547	5.5	4	0	1.75	0	0	1.5
281	1	2	11	1	350	5	98.6111	100	4.78796	100	85	1	502	5.25	4.2	0	1.5	0	0	1.5
281	1	2	14	1	384	13	95.8333	94.4444	3.2062	90	100	1	483.5	5.25	4	0	1.5	0	0	1.5
281	2	2	11	1	373.5	13	98.6111	94.4444	2.53722	95	95	2	498	4.75	4	0	1.75	0	0	1.5
281	2	2	14	1	371	16	91.6667	100	3.77697	100	100	0	478	6	4.4	0	1.5	0	0	1.5
281	2	2	17	5	401	28	87.5	47.2222	1.96737	95	95	4	514	2.25	3	0	1	1.5	0.333333	2.5
281	2	2	20	7	400	15	97.2222	86.1111	2.9425	95	90	7	583	0	2.2	0	1.75	3.5	0	4.5
281	2	2	23	7	350	7	93.0556	97.2222	2.82471	95	95	0	483.5	0.75	1.8	0	2.25	4.25	0	4.5
281	2	2	11	2	422	22	93.0556	83.3333	3.77697	90	80	1	435	4	3	0	2	0	0.666667	3
281	2	2	14	3	402	16	97.2222	88.8889	2.62963	100	95	3	484	3.75	3.8	1	2	0.5	0.666667	2.5
281	2	2	17	3	438	32	95.8333	91.6667	2.9425	95	100	3	530.5	2.5	3.4	0	2	0.5	0.666667	2.5
281	2	2	20	7	431	28	91.6667	27.7778	1.86273	100	85			0	1.8	0	3	3.75	1.66667	5
281	2	2	23	7	466	36	.		1.86273	100	100	8	604	0	2	0	3	5.5	1.66667	5.5
282	1	1	2	1	440	18	97.2222	100	2.9425	95	85	1	471	3	3	0	0	0	0.333333	0
282	1	1	5	2	418	27	93.0556	80.5556	2.07316	95	75	0	475	1.25	1.4	0.5	0	0.5	0.666667	0.5
282	1	1	8	3	449	34	98.6111	75	1.66484	100	85	15	781.5	1.5	2.4	1	0	1	1	1
282	1	1	11	3	450.5	30	97.2222	66.6667	1.38299	95	65	1	462	1.25	2	0	0	1.5	0.666667	1.5
282	1	1	14	5	477	38	98.6111	86.1111	3.7685	95	85	4	607.5	0.75	0.8	2	1.5	3.5	1	2.5
282	1	1	2	2	459	34	98.6111	94.4444	3.3614	100	95	3	581	2.5	3.2	0	0	0	1.33333	0
282	1	1	5	2	465	34	98.6111	91.6667	4.78796	100	75	4	597.5	3	2.6	0	0	0.25	0.333333	1
282	1	1	8	2	567	60	93.0556	88.8889	2.18137	95	60	2	510	1.25	3	0.5	0	1	0.666667	0
282	1	1	11	2	452	27	95.8333	83.3333	2.28019	100	85	1	587.5	1.5	2	0.5	0	1	0.333333	2
282	1	1	14	1	468	35	98.6111	97.2222	4.12564	100	95	1	559	3.25	4.2	0	0	0	1	0
282	2	1	11	1	411.5	16	97.2222	100	2.82471	95	75	1	545	3.25	4	0	0	0	0.333333	0
282	2	1	14	2	457	30	98.6111	86.1111	2.14147	95	90	2	539	2.25	2.4	0	0	0.25	0	1
282	2	1	17	3	439	22	97.2222	80.5556	2.84905	90	75	1	581	1	3	0	0	0.75	0.333333	0.5
282	2	1	20	3	503	47	98.6111	91.6667	4.78796	95	90	6	650	2	2.4	0	0	1	0.666667	0.5
282	2	1	23	4	488	42	98.6111	52.7778	-0.786104	95	60	1	580	0.5	1	0	0.25	1	0.333333	2
282	2	1	11	1	465.5	29	97.2222	94.4444	3.54433	100	90	2	544.5	2.5	4.6	0	0	0	1.33333	0
282	2	1	14	1	463.5	36	97.2222	88.8889	2.85951	100	90	4	606	1.75	2.6	0	0	0	0.666667	0
282	2	1	17	3	459	31	94.4444	91.6667	2.10056	90	80	11	716.5	1	2.6	0	0	1.25	0.333333	1
282	2	1	20	3	444	30	94.4444	91.6667	3.00426	100	80	1	538	0.5	2.4	0	0	1.75	1	2
282	2	1	23	6	445	26	87.5		-2.15678	40	25	8	602	0	0.6	0	0	4	0.666667	2.5
283	1	2	2	2	356	2	98.6111	97.2222	3.2062	95	100	7	534.5	3.75	3.8	0	0.75	3	1	3
283	1	2	5	2	362	3	97.2222	75	3.54433	100	100	5	518	3.75	4.6	0	0	1.5	1	4
283	1	2	8	2	368	3	98.6111	91.6667	4.78796	95	100	8	539	4	4.8	0	0	0.5	0	2
283	1	2	11	3	349	1	95.8333	72.2222	2.71132	100	95	0	442.5	2.75	3	0	0	2.5	0	2.5
283	1	2	14	4	357	1	95.8333	91.6667	3.27841	85	95	4	477	2.5	3.2	0	0	3.5	0	2.5
283	1	2	2	3	324	0	94.4444	94.4444	3.54433	100	100	1	434	3	3.4	0	0	3.25	0	1.5
283	1	2	5	2	332	1	94.4444	94.4444	3.27841	100	95	1	441.5	3.25	3.6	0	0	1.75	0	2
283	1	2	8	1	321	3	94.4444	94.4444	3.27841	95	100	4	486	3.75	4	0	0	1.25	0	2.5
283	1	2	11	2	341	2	95.8333	94.4444	2.98548	95	100	0	428.5	3.75	4	0	0	1.25	0	2.5
283	1	2	14	3	326.5	3	95.8333	91.6667	3.27841	90	90	1	426	1.75	2.8	0	0	3.25	0	3.5
283	2	2	11	3	322	1	95.8333	97.2222	4.12564	90	95	2	423	2.25	1.8	0	0	3.5	0	2.5
283	2	2	14	4	355.5	5	95.8333	88.8889	3.69399	100	100	3	443	1.75	1.6	0	0	4	0	1.5
283	2	2	17	5	366	8	94.4444	63.8889	3.69399	100	90	4	522.5	0.75	1	0	0	5.25	0	2.5
283	2	2	20	5	345	4	90.2778	83.3333	2.58536	95	100	2	463	0.75	1.8	0	0	5	0	2.5
283	2	2	23	7	373.5	8	93.0556	91.6667	3.3614	95	100	4	447.5	0	0.8	0	0	5.25	0	1.5
283	2	2	11	3	364	7	93.0556	75	3.54433	100	90	2	447.5	2.25	1.8	1.5	0	4.5	0	2
283	2	2	14	4	365.5	6	98.6111	100	3.69399	95	95	1	498	1.5	2	0	0	3.5	0	2
283	2	2	17	4	378	13	91.6667	97.2222	4.12564	85	100	5	500.5	1.25	1.6	0	0	3.75	0	2
283	2	2	20	5	386	10	95.8333	80.5556	3.12321	100	90	2	448.5	1.5	1.8	0	0	4.5	0	2
283	2	2	23	7	384	14	95.8333	69.4444	3.69399	95	85	4	461	0	0.8	0	0	5.25	0	2.5
285	1	2	2	2	301	1	98.6111	100	3.27841	100	95	4	459.5	1.5	2.4	0	0	0	0	0
285	1	2	5	1	308	4	98.6111	97.2222	2.71262	95	90	1	441	1.75	2.4	0	0	0	0	0
285	1	2	8	2	290	1	98.6111	100	3.06847	95	95	3	451	0.75	1.4	0	0	0.5	0	0
285	1	2	11	3	281	0	98.6111	97.2222	3.77697	95	100	1	442	0.5	1	0	0	0.25	0	0
285	1	2	14	4	343	4	97.2222	91.6667	2.03683	95	100	3	445	0	1.2	0	0	0.5	0	0
285	1	2	2	2	305.5	3	98.6111	100	2.28935	100	100	4	461	0.5	1.4	0	0	0	0	0
285	1	2	5	2	370.5	8	95.8333	91.6667	2.98548	90	100	4	458.5	0.5	1.4	0	0	0	0	0
285	1	2	8	2	357	10	98.6111	100	3.06847	90	100	4	451.5	0.75	1.2	0	0	0	0	0
285	1	2	11	3	298	2	91.6667	88.8889	3.06847	95	95	5	464	0.25	1.4	0	0	0.25	0	0
285	1	2	14	3	301.5	1	94.4444	91.6667	3.3614	90	100	2	442.5	0	0.6	0	0.25	0.25	0	0
285	2	2	11	1	286.5	1	98.6111	100	3.54433	85	95	9	464.5	1.5	2	0	0	0	0	0
285	2	2	14	1	289.5	0	97.2222	100	3.77697	95	80	2	466	0.75	1.6	0	0.25	0	0	0
285	2	2	17	1	304	0	98.6111	91.6667	2.9425	100	90	5	464	0.5	1.6	0	0	0.25	0	0
285	2	2	20	2	291	3	95.8333	69.4444	2.9425	85	95	1	456	0.5	1.6	0	0	0.25	0	0
285	2	2	23	4	327	3	97.2222	94.4444	3.12321	90	95	1	460	0	0.8	0	0	1.75	0	0
285	2	2	11	1	305.5	0	98.6111	88.8889	2.74172	100	95	1	434.5	1.5	1.8	0	0	0	0	0
285	2	2	14	1	309	1	98.6111	88.8889	3.06847	100	100	1	446	1	2	0.5	0	0	0	0
285	2	2	17	1	319	4	93.0556	91.6667	3.2062	100	95	4	501	0.75	1.8	0	0	0	0	0
285	2	2	20	2	321	5	98.6111	86.1111	2.9425	100	95	3	432	0	1.4	0	0	0.5	0	0
285	2	2	23	5	358	12	98.6111	72.2222	4.12564	95	95	9	519	0	0.8	0	0	1.25	0	0
286	1	1	2	2	408.5	17	95.8333	100	2.71132	90	100	5	527.5	1.75	4.6	0	0	0.25	0	0
286	1	1	5	2	356	12	95.8333	94.4444	4.78796	95	100	0	557	2	4.6	0	0	0.25	0	0
286	1	1	8	2	327	3	95.8333	83.3333	3.06847	100	85	5	581	1.25	4.6	0	0	0.25	0	0
286	1	1	11	3	421.5	25	98.6111	75	3.2062	100	95	1	517	1.25	4.2	0	0	0.5	0	0
286	1	1	14	4	444	27	97.2222	80.5556	4.78796	95	95	7	597	0.75	3.6	0	0	1.5	0	0
286	1	1	2	1	398	10	95.8333	83.3333	3.46134	100	100	0	503	2.75	4.4	0	0	0.25	0	0
286	1	1	5	2	421	18	91.6667	91.6667	2.24726	95	100	7	613	1.5	4.2	0	0	0	0	0
286	1	1	8	2	464	33	90.2778	88.8889	3.12321	100	95	6	558	1.25	3.4	0	0	0	0	0
286	1	1	11	3	438	23	93.0556	77.7778	3.54433	100	100	0	502	1.25	4	0	0	0.5	0	0
286	1	1	14	4	461	26	95.8333	75	3.3614	100	95	0	508.5	0.75	4.2	0	0	1	0	0
286	2	1	11	3	392	12	98.6111	97.2222	3.77697	100	100	0	500	1.25	4.2	0	0	0.75	0	0
286	2	1	14	2	446	25	93.0556	72.2222	3.2062	100	100	4	544.5	0.75	4.6	0	0	0.25	0	0
286	2	1	17	3	433	20	95.8333	75	3.54433	100	100	4	561	0.75	3.2	0	0	1.25	0	0
286	2	1	20	4	366.5	11	95.8333	83.3333	4.78796	100	100	1	516	0.75	3	0	0	0.75	0	0
286	2	1	23	7	389	25	97.2222	72.2222	2.9425	95	95	5	566	0.25	2.6	0	0	4.5	0	0
286	2	1	11	3	416	18	95.8333	83.3333	3.54433	100	90	1	527	0.75	3.2	0	0	0.25	0	0
286	2	1	14	3	411	19	94.4444	80.5556	3.77697	100	100	1	488	1	3.4	0	0	0.25	0	0
286	2	1	17	2	414.5	23	95.8333	72.2222	3.46134	90	85	1	502	1	3.4	0	0	0.25	0	0
286	2	1	20	4	400	13	97.2222	66.6667	3.54433	100	100	2	512	0.75	3.4	0	0	2.5	0	0
286	2	1	23	7	395	19	93.0556	66.6667	3.54433	95	95	5	556	0.25	3	0	0.25	4.5	0	0
287	1	1	2	1	320	0	97.2222	75	3.2062	100	90	1	551	4.5	4	0	0	0	0	0
287	1	1	5	1	341	5	97.2222	58.3333	3.2062	95	100	6	607.5	3.75	4.8	0	0	0.25	0	0
287	1	1	8	2	328	3	98.6111	44.4444	3.3614	90	100	2	546.5	3	4	0	0	0.25	0	0
287	1	1	11	2	315	4	97.2222	47.2222	3.3614	90	90	3	599	2	3.6	0	0	0.25	0	0
287	1	1	14	3	339	4	97.2222	63.8889	3.54433	100	100	3	556.5	0.75	4	0	0	1.25	1	0
287	1	1	2	1	315	13	97.2222	66.6667	3.2062	95	90	2	587	3.75	4	0	0	0	0	0
287	1	1	5	1	328	11	97.2222	66.6667	3.54433	100	95	3	607	3.75	4	0	0	0	0.666667	0
287	1	1	8	2	336	5	98.6111	72.2222	3.3614	100	95	5	552	2.25	3.2	0	2.5	0.5	2.33333	0.5
287	1	1	11	3	332.5	5	97.2222	61.1111	3.54433	100	100	3	590.5	1.5	4	0	0	0.5	1	0
287	1	1	14	2	350	9	98.6111	69.4444	3.06847	90	100	3	554	1.25	3.6	0	0	0.25	0.333333	0
287	2	1	11	1	320	5	98.6111	75	3.3614	100	95	2	513.5	4.5	4.8	0	0	0	1	0
287	2	1	14	1	331	2	97.2222	77.7778	3.06847	100	95	0	503	4.25	4	0	0	0	1	0
287	2	1	17	5	364	11	95.8333	50	4.12564	100	100	2	578	1.5	3	0	0	2.75	1	0
287	2	1	20	6	348.5	6	97.2222	55.5556	3.54433	100	95	2	565	0.5	4	0	0	4.25	1	0
287	2	1	23	6	341.5	5	97.2222	66.6667	3.2062	90	100	5	597	0.5	4	0	0	3.75	1	0
287	2	1	11	1	332.5	9	97.2222	69.4444	3.06847	100	100	0	535	4.5	4.8	0	0	0	1	0
287	2	1	14	1	302	1	98.6111	55.5556	3.3614	100	95	0	537	4.5	4.8	0	0	0	1	0
287	2	1	17	2	349	12	95.8333	63.8889	3.77697	95	100	0	564	3	4.4	0	0	1.5	1	0
287	2	1	20	6	345	1	98.6111	69.4444	3.46134	95	100	0	507	1.5	3	0	0	2.25	1	0
287	2	1	23	2	308.5	5	98.6111	47.2222	3.77697	100	90	1	533	1.75	3.2	0	0	1	1	0
289	1	1	2	2	284	1	98.6111	88.8889	2.9425	100	100	15	614	2.25	3.8	1.5	1	3	2.33333	1
289	1	1	5	2	287	0	98.6111	91.6667	3.2062	95	100	2	517	3.25	3.6	1	1.75	2.25	2.33333	1.5
289	1	1	8	2	279.5	0	98.6111	86.1111	2.74172	100	100	2	488.5	3.75	4.6	1	1	2.5	1.33333	1
289	1	1	11	2	293	0	98.6111	80.5556	3.27841	100	95	2	492.5	3.75	4.4	1	1	2	1.33333	1
289	1	1	14	4	275.5	0	98.6111	86.1111	3.12321	100	95	0	484.5	1.5	2.4	1.5	2.75	4	1.33333	2
289	1	1	2	3	302	0	97.2222	75	2.14147	95	95	3	481.5	2.75	3.4	1	1.5	3.5	1	1.5
289	1	1	5	2	265	1	98.6111	94.4444	3.77697	100	90	0	449	3.25	3.8	1.5	1.25	2.25	1.33333	1.5
289	1	1	8	2	290	0	98.6111	94.4444	2.71132	100	100	5	524	3.75	4	1	1	2.25	1	1
289	1	1	11	2	290.5	1	97.2222	80.5556	2.24726	100	95	2	459	3.75	3.4	1	2.25	2	1	2
289	1	1	14	4	276	0	97.2222	88.8889	3.2062	95	100	0	463	1.25	2.4	1.5	2.75	4.25	1.33333	1.5
289	2	1	11	3	266	0	98.6111	88.8889	2.82471	100	95	0	450	3.25	1.8	2	4	2.75	2.66667	4
289	2	1	14	2	265.5	0	97.2222	86.1111	3.3614	100	95	0	472	3.25	3.2	1	1.75	2.25	1.33333	1.5
289	2	1	17	2	269	0	97.2222	75	4.12564	100	100	0	465	3.25	3.4	1	1	1.75	1.33333	1
289	2	1	20	4	275	1	98.6111	69.4444	1.9322	90	100	0	479.5	1.75	2	2	4.25	4.25	1.66667	3
289	2	1	23	5	276	2	98.6111	66.6667	2.62963	100	100	1	504	1	2.2	2	4.25	4.75	1.66667	3
289	2	1	11	3	283.5	1	98.6111	72.2222	2.60441	100	100	2	486	2.75	3	1	1.5	2	1.33333	1.5
289	2	1	14	2	274.5	2	97.2222	80.5556	1.63875	95	100	0	441	2.75	3	1.5	1.75	2	2	2
289	2	1	17	2	273.5	0	98.6111	94.4444	2.29346	95	100	1	447	2.5	3	2	2	2	1.66667	2
289	2	1	20	3	276	0	97.2222	91.6667	4.12564	100	95	1	484	2.25	2.2	2	2.75	3.5	2	2
289	2	1	23	5	255	0	95.8333	63.8889	3.77697	100	100	1	474.5	1.25	1.2	1	3.75	5.25	2	3
290	1	2	2	2	342	0	98.6111	100	3.77697	90	100	1	577	5	5	0	0	0	0	0
290	1	2	5	2	324	1	98.6111	100	3.54433	100	95	4	678	5	5	0	0	0	0	0
290	1	2	8	2	318	0	98.6111	83.3333	3.54433	100	95	0	576.5	5	5	0	0	0	0	0
290	1	2	11	2	313	0	97.2222	91.6667	3.69399	100	100	3	669	4.5	4.8	0	0	0.25	0	0
290	1	2	14	3	320	1	98.6111	100	4.12564	95	90	2	630	4	4.6	0	0	0.75	0	0
290	1	2	2	2	305	0	98.6111	100	3.77697	100	95	3	644	5	5	0	0	0	0	0
290	1	2	5	2	305.5	1	98.6111	86.1111	3.77697	95	100	2	665	5	5.2	0	0	0	0	0
290	1	2	8	2	287	0	98.6111	100	3.69399	100	95	8	685.5	4.75	4.8	0	0	0.5	0.333333	0
290	1	2	11	3	283	0	98.6111	100	3.77697	100	100	2	661.5	4.25	4.2	0	0	0.5	0	0
290	1	2	14	3	299.5	2	97.2222	100	4.78796	100	95	6	635	4	4	0	0.25	0.75	0	0
290	2	2	11	2	285.5	0	95.8333	97.2222	4.12564	95	100	0	555	5	4.8	0	0	0	0	0
290	2	2	14	2	265	1	98.6111	100	3.3614	100	100	0	557.5	4.25	4.6	0	0	0.5	0	0
290	2	2	17	2	274	0	97.2222	100	4.12564	100	100	1	677.5	4	4.4	0	0	0.5	0	0
290	2	2	20	3	296.5	1	98.6111	83.3333	4.12564	100	90	4	634.5	4	4.2	0	0	0.75	0	0
290	2	2	23	4	328	2	98.6111	63.8889	2.71132	95	90	10	628.5	4	4.2	0	0	1	0	0
290	2	2	11	2	269.5	0	98.6111	100	3.69399	100	90	0	536.5	5	5	0	0	0	0	0
290	2	2	14	2	278	1	97.2222	88.8889	3.3614	100	100	0	574	5	5	0	0	0	0	0
290	2	2	17	2	261	0	97.2222	97.2222	3.77697	95	100	3	609.5	4.75	4.8	0	0	0	0	0
290	2	2	20	3	318	3	97.2222	58.3333	3.24573	100	85	11	768	4	4.4	0	0	0.5	0	0
290	2	2	23	4	287	1	98.6111	94.4444	3.11466	100	95	8	721	4	4	0	0	1	0	0
291	1	1	2	2	312	6	88.8889	69.4444	4.12564	85	100	5	510.5	2.5	4	0	0.5	0.75	2	2
291	1	1	5	2	337	4	97.2222	63.8889		95	80	4	475	2.25	4.2	0	2	0.5	2.33333	1.5
291	1	1	8	3	344.5	7	95.8333	80.5556	3.54433	95	85	3	454	2.5	3.8	0	1.25	1	2	1.5
291	1	1	11	4	371	18	94.4444	75	3.3614	90	70	3	464	1.5	2.6	0	0.5	1.5	0.333333	2.5
291	1	1	14	3	391	27	94.4444	88.8889	2.9425	100	95	1	500	2.75	4	0	0	0	0	0.5
291	1	1	2						3.46134
291	1	1	5	3	331	8	98.6111	94.4444	3.18718	95	100	4	496	2.75	4.2	0	0	0	2	1
291	1	1	8	6	363	13	95.8333	91.6667	3.46134	90	90	2	506.5	2	3.8	0	0.25	1.5	3	2.5
291	1	1	11	4	389.5	19	95.8333	61.1111	3.3614	100	75	3	466	0.75	2.8	0.5	0	0	2	0.5
291	1	1	14	4	402	21	90.2778	77.7778	3.2062	100	95	3	470	1	3.6	0	0.75	0	2	1.5
291	2	1	11	3	312	2	94.4444	77.7778	3.3614	90	95	2	513.5	1.5	3.8	0	1.5	1.25	2	0.5
291	2	1	14	4	320.5	2	95.8333	77.7778	3.54433	95	90	0	464	1.25	3.8	0	0	1.5	2	0.5
291	2	1	17	4	358.5	10	91.6667	69.4444	2.84905	95	85	0	484.5	1.5	4	0	1.5	1.75	2	2.5
291	2	1	20	6	339.5	7	90.2778	83.3333	3.3614	85	95	3	454	1.25	3.8	0	1	1.5	2	1.5
291	2	1	23	7	406.5	26	87.5	50	2.1289	100	80	14	574	0.75	3	1	2	3.75	2	4.5
291	2	1	11	3	329	9	95.8333	77.7778	3.2062	95	90	2	464	2.25	4.4	0	0	0	2	0
291	2	1	14	2	313	1	95.8333	77.7778	3.06847	95	90	1	439.5	2.5	5	0	0	0.5	2	0.5
291	2	1	17	3	269	0	93.0556	77.7778	3.06847	95	90	1	441	1.25	4.2	0	0.25	0.25	2	1
291	2	1	20	4	319	4	86.1111	55.5556	3.06847	90	100	3	469	1.5	4.2	0	1	1.5	2	2
291	2	1	23	6	311.5	12	77.7778	50	2.07316	85	95	8	485	1.25	4	0	2.25	1.75	2	3.5
292	1	2	2	2	328	3	98.6111	94.4444	4.12564	100	95	3	565.5	1.75	3	0	0	2.75	0	0
292	1	2	5	2	320	1	95.8333	100	4.12564	95	100	4	574.5	2.25	3	0	0	2	0	0
292	1	2	8	2	337	4	98.6111	100	3.77697	95	90	2	506.5	2	3.2	0	0	2.25	0	0
292	1	2	11	3	351	5	98.6111	97.2222	3.3614	100	100	4	570	1.75	3	0	0	3.25	0	0
292	1	2	14	5	307	3	98.6111	97.2222	3.77697	100	90	1	500.5	1.25	3	0	0	3.75	0	0
292	1	2	2	2	339	8	95.8333	94.4444	4.70497	95	90	4	526.5	2.25	4.6	0	0	2.25	0	0
292	1	2	5	2	327	7	98.6111	94.4444	3.77697	100	100	1	515.5	2	3	0	0	3.25	0	0
292	1	2	8	3	352	4	97.2222	100	3.54433	100	90	5	587	2	3	0	0	4	0	0
292	1	2	11	4	364	5	98.6111	97.2222	3.06847	95	100	5	554.5	1.25	3	0	0	4.5	0	0
292	1	2	14	5	382	11	95.8333	100	3.54433	100	85	3	532.5	2	3	0	0	4	0	0
292	2	2	11	4	313	5	98.6111	100	4.78796	100	85	0	531	1.25	3.4	0	0	3.25	0	0
292	2	2	14	2	320	4	98.6111	100	4.78796	100	100	2	508	1.25	3	0	0	2.5	0	0
292	2	2	17	2	328.5	5	98.6111	97.2222	3.54433	95	95	2	569	1.25	3	0	0	3.75	0	0
292	2	2	20	5	360	15	98.6111	100	3.2062	100	100	5	568	0.75	3	0	0	4.5	0	0
292	2	2	23	7	440.5	29	98.6111	86.1111	3.77697	100	100	10	609	0.75	2.8	0	0	5	0	0
292	2	2	11	2	342	6	98.6111	100	3.77697	100	100	2	505.5	1.75	3	0	0	1.75	0	0
292	2	2	14	2	347	10	98.6111	94.4444	3.3614	95	100	0	501.5	1.5	3	0	0	2.75	0	0
292	2	2	17	3	365	13	98.6111	97.2222	3.2062	100	100	3	537.5	1.25	3	0	0	3	0	0
292	2	2	20	5	386.5	20	97.2222	100	3.54433	100	100	6	545.5	1.25	3	0	0	3.5	0	0
292	2	2	23	6	382	21	97.2222	100	3.2062	95	100	5	591	0.25	2.2	0	0	5.25	0	0
294	1	2	2	2	305.5	2	97.2222	100	3.06847	90	95	7	523	1.75	1.2	0	0	0.75	0	0
294	1	2	5	2	287.5	0	95.8333	91.6667	2.9425	90	100	2	507.5	1.75	2.4	0	0	0.5	0	0
294	1	2	8	2	337	2	94.4444	72.2222	3.3614	90	90	4	514	0.5	1	0	0	2	0	0
294	1	2	11	3	315	4	98.6111	58.3333	2.9425	95	100	1	503.5	0	1	0	0	3	0	0.5
294	1	2	14	4	320.5	2	95.8333	97.2222	3.3614	100	100	8	547.5	0	1	0	0	3.75	0	0
294	1	2	2	4	337.5	3	97.2222	97.2222	2.9425	95	95	5	505	0	0.6	0.5	0	3	0	0
294	1	2	5	3	306	0	94.4444	94.4444	2.9425	100	95	2	489	1.5	2	0	0	1.75	0	0
294	1	2	8	2	309	2	95.8333	94.4444	3.3614	95	100	1	491.5	0.75	2.8	0	0	2.5	0	0
294	1	2	11	3	324.5	1	94.4444	83.3333	2.9425	95	90	0	452.5	1	1.6	0	0	2.5	0	0
294	1	2	14	4	363.5	0	95.8333	94.4444	3.2062	95	100	1	478	0	0.6	0	0	3.5	0	0
294	2	2	11	5	337	1	95.8333	97.2222	3.06847	95	95	0	445	0	0.4	1	0.5	4	0	0
294	2	2	14	3	348	6	95.8333	97.2222	3.06847	90	90	3	454	1	1.4	0	0	2.25	0	0
294	2	2	17	3	341	3	93.0556	88.8889	2.9425	95	100	2	490.5	1	1	0	0	2.5	0	0
294	2	2	20	5	374	10	97.2222	80.5556	3.12321	95	95	1	481	0.25	0.2	0	0	3	0	0
294	2	2	23	6	392	9	98.6111	83.3333	2.60441	90	95	3	493	0	0	1.5	0	4.5	0	0
294	2	2	11	3	341	0	97.2222	88.8889	2.82471	95	95	2	466	0	0.2	0	0	2.5	0	0
294	2	2	14	3	346	4	94.4444		2.28935	100	85	2	463	0.25	0.4	0	0	2.5	0	0
294	2	2	17	3	333	3	95.8333	83.3333	3.2062	100	100	4	496.5	0.5	0.4	0	0	2.25	0	0
294	2	2	20	4	350	1	97.2222	97.2222	2.82471	90	95	0	483	0.25	0.6	0	0	2.75	0	0
294	2	2	23	5	324.5	1	94.4444	94.4444	1.88513	75	95	1	499	0	1	0	0	4	0	0
295	1	2	2	6	373	9	97.2222	80.5556	3.3614	95	70	4	552	1.25	1.8	3	2	4.75	2.33333	2.5
295	1	2	5	4	374	3	97.2222	80.5556	2.9425	90	90	5	562.5	1.25	1.8	2.5	1.5	3.25	2.33333	2
295	1	2	8	4	348	2	95.8333	55.5556	2.74172	100	90	4	529	1.25	2.2	2.5	2	3.5	2.33333	2.5
295	1	2	11	4	332	2	94.4444	80.5556	2.62963	100	90	0	475.5	2.25	1.8	2.5	2.25	3.25	2.33333	2.5
295	1	2	14	4	330	2	95.8333	80.5556	3.06847	90	95	3	543	1.75	1.8	3	2	3.25	2	2.5
295	1	2	2	4	347	2	97.2222	91.6667	2.85951	90	95	6	541.5	2	2	3	2	2.75	2	2
295	1	2	5	3	320	2	94.4444	94.4444	3.54433	75	95	1	533	1.75	1.6	2.5	1.75	2.75	2.33333	1.5
295	1	2	8	3	320	5	94.4444	94.4444	3.00426	95	95	7	572	1.75	1.8	3	2.25	2.75	2.33333	2
295	1	2	11	4	321	1	98.6111	88.8889	1.99235	95	90	1	481	2.25	2	3	1.75	3.25	2.33333	2
295	1	2	14	5	326	0	97.2222	77.7778	1.62703	90	95	0	481	1.75	1.8	2.5	2.25	3.5	2.33333	2
295	2	2	11	4	343	4	95.8333	97.2222	2.71262	95	100	2	520	2.5	2	3	2	2.75	2.66667	2
295	2	2	14	3	323	0	98.6111	94.4444	2.14147	95	100	1	506	2.25	2	2.5	2	2.75	2.33333	2.5
295	2	2	17	4	325.5	1	97.2222	94.4444	2.0503	100	90	5	536.5	2	2	2	2	2.5	2.33333	1.5
295	2	2	20	5	324.5	2	95.8333	83.3333	1.64967	90	100	6	559.5	1.25	1.8	3	1.75	3	2.33333	1.5
295	2	2	23	7	367	5	98.6111	75	1.42264	100	100	8	559	1.25	1.8	3.5	2.25	4.5	2	2.5
295	2	2	11	2	320.5	0	95.8333	88.8889	1.73166	90	100	0	469	2.5	2	2	0.75	2	1.33333	1
295	2	2	14	2	316	1	95.8333	55.5556	2.52142	95	95	0	476.5	2.5	2.4	2	0.25	2.25	1.33333	0.5
295	2	2	17	4	351	3	95.8333	83.3333	1.34977	95	95	1	522	1.5	1.8	3	0.75	2.75	2	1
295	2	2	20	6	337.5	1	94.4444	75	1.20578	85	100	2	514	1	1.8	3	1.25	3.5	2	1
295	2	2	23	7	351	2	94.4444	44.4444	1.5768	90	100	0	497

## Sheet: Variable List (Performance)
Column	Variable Name	Definition
A	ID	Participant ID
B	Race	1=African-American
		2=European-American
C	Study Phase	1=Baseline (aligned)
		2=Delayed (misaligned)
D	Hours after baseline wake time	Hours after baseline wake time (refer to Fig 1) that cognitive performance tests were started
E	Stanford Sleepiness Scale	Stanford Sleepiness Scale score Hoddes et al. Psychophysiology. 1973;10:431-6.
F	SRT Median RT	Median Reaction time (ms) on the Simple Reaction Time (SRT) task
G	SRT Lapses	Number of Lapses (reaction time >500ms) on the Simple Reaction Time (SRT) task
H	CSL % correct	Percent correct responses on the code substitution - learning task
I	CSD % correct	Code Substitution-Delayed percent correct responses
J	GNG d-prime	Go/No-Go task d-prime score
K	MTH % correct	Mathematical Processing task percent correct responses
L	M2S % correct	Matching to Sample task percent correct responses
M	Pro RT SR	Procedural Reaction Time task number of Slow Responses (responses exceeding the 90th percentile of the cumulative distribution of each participant’s baseline responses).
N	Pro RT Median RT	Procedural Reaction Time task median reaction time (ms)
O	Mood - Vigor	Mean score across Vigor dimensions on mood scale (items: alert, lively, vigorous, energetic)
P	Mood- Happiness	Mean score across Happiness dimension on mood scale (items: happy, satisfied, content, cheerful, pleased)
Q	Mood- Depression	Mean score across Depression dimension on mood scale (items: sad, discouraged)
R	Mood- Anger	Mean score across Anger dimension on mood scale (items: grouchy, irritated, annoyed, angry)
S	Mood- Fatigue	Mean score across Fatiuge dimension on mood scale (items: weary, tired, sluggish, drowsy)
T	Mood- Anxiety	Mean score across anxiety dimension on mood scale (items: nervous, anxious, uneasy)
U	Mood- Restlessness	Mean score across restlessness dimension on mood scale (items: restless, agitated)
